# Supplementary material for: Nickel-catalyzed intermolecular oxidative Heck arylation driven by transfer hydrogenation
Source: PubMed Central journal article supplement (PMC6831602; doi:10.1038/s41467-019-12949-1), 2019-11-05
Supplement: 41467_2019_12949_MOESM2_ESM.pdf [file 41467_2019_12949_MOESM2_ESM.pdf]

### **Description of Additional Supplementary Files**

File Name: Supplementary Data 1

Description: Calculated Cartesian Coordinates and Single Point Energies.
