# Supplementary material for: Nickel-catalyzed intermolecular oxidative Heck arylation driven by transfer hydrogenation
Source: PubMed Central journal article supplement (PMC6831602; doi:10.1038/s41467-019-12949-1), 2019-11-05
Supplement: 41467_2019_12949_MOESM3_ESM.pdf [file 41467_2019_12949_MOESM3_ESM.pdf]

## Supplementary Data 1

### Calculated Cartesian Coordinates and Single Point Energies

A

|    |          |          |          |
|----|----------|----------|----------|
| Ni | 0.32514  | 0.61159  | -0.0517  |
| P  | 2.48957  | 0.26058  | -0.10064 |
| C  | 3.37391  | 0.61541  | 1.46209  |
| H  | 4.45139  | 0.42443  | 1.35993  |
| H  | 3.21854  | 1.6661   | 1.73824  |
| H  | 2.97746  | -0.01239 | 2.27063  |
| C  | 3.34348  | 1.35777  | -1.29287 |
| H  | 3.14801  | 2.40588  | -1.0337  |
| H  | 4.42789  | 1.17949  | -1.28682 |
| H  | 2.95831  | 1.17743  | -2.3045  |
| C  | 3.14495  | -1.38617 | -0.56305 |
| H  | 2.88458  | -2.1253  | 0.20498  |
| H  | 2.70619  | -1.70709 | -1.51598 |
| H  | 4.23892  | -1.35259 | -0.66301 |
| H  | 0.83969  | 1.96659  | 0.36048  |
| O  | -0.27787 | -1.0843  | -0.65698 |
| C  | -0.62009 | -2.09428 | 0.23804  |
| C  | -0.05236 | -1.845   | 1.64035  |
| H  | -0.33179 | -2.64268 | 2.34707  |
| H  | 1.04671  | -1.79628 | 1.61478  |
| H  | -0.42566 | -0.88952 | 2.0456   |
| C  | -0.05658 | -3.42444 | -0.27836 |
| H  | -0.39557 | -4.2836  | 0.32204  |
| H  | -0.36087 | -3.59668 | -1.32007 |
| H  | 1.04273  | -3.40984 | -0.25559 |
| C  | -2.15514 | -2.21337 | 0.37855  |
| H  | -2.39666 | -2.96065 | 1.15419  |
| H  | -2.52411 | -1.24646 | 0.76348  |
| C  | -2.88265 | -2.56687 | -0.90725 |
| H  | -2.6981  | -3.6085  | -1.20581 |
| H  | -3.9708  | -2.4516  | -0.80417 |
| H  | -2.55299 | -1.92302 | -1.73462 |
| P  | -1.6023  | 1.66913  | 0.02405  |
| C  | -2.41909 | 1.70773  | 1.6635   |
| H  | -3.3143  | 2.34529  | 1.63891  |
| H  | -2.71508 | 0.69593  | 1.96825  |
| H  | -1.71913 | 2.10284  | 2.41115  |
| C  | -2.93754 | 1.10289  | -1.09241 |
| H  | -3.28968 | 0.10809  | -0.79747 |

|                                          |                |         |                             |
|------------------------------------------|----------------|---------|-----------------------------|
| H                                        | -3.78506       | 1.8021  | -1.06449                    |
| H                                        | -2.55846       | 1.0431  | -2.12067                    |
| C                                        | -1.51254       | 3.45195 | -0.38613                    |
| H                                        | -0.88528       | 3.96756 | 0.35207                     |
| H                                        | -1.05294       | 3.58286 | -1.37427                    |
| H                                        | -2.51183       | 3.90904 | -0.39324                    |
| Zero-point correction=                   |                |         | 0.388676 (Hartree/Particle) |
| Thermal correction to Energy=            |                |         | 0.420845                    |
| Thermal correction to Enthalpy=          |                |         | 0.421932                    |
| Thermal correction to Gibbs Free Energy= |                |         | 0.321829                    |
| SCF Done: E(RwB97XD) =                   | -2703.69498585 |         |                             |

A-1

|    |          |          |          |
|----|----------|----------|----------|
| C  | -1.06953 | -2.56592 | 1.21288  |
| C  | -0.88052 | -1.05222 | 1.29776  |
| O  | -1.79057 | -0.41212 | 1.87001  |
| N  | 0.20698  | -0.52322 | 0.70308  |
| C  | 0.54036  | 0.81998  | 0.78872  |
| C  | 1.80468  | 1.15142  | 0.18431  |
| C  | -0.16448 | 1.86353  | 1.38905  |
| C  | 2.29082  | 2.48441  | 0.17872  |
| C  | 0.33196  | 3.18286  | 1.38308  |
| H  | -1.10629 | 1.64448  | 1.87939  |
| C  | 3.68829  | 0.39226  | -0.93921 |
| C  | 3.53725  | 2.72761  | -0.44481 |
| C  | 1.52735  | 3.50685  | 0.78891  |
| H  | -0.25971 | 3.96101  | 1.86576  |
| C  | 4.23304  | 1.68692  | -1.00572 |
| H  | 3.9285   | 3.74497  | -0.46658 |
| H  | 1.90313  | 4.52972  | 0.78109  |
| H  | 5.1951   | 1.83998  | -1.48953 |
| N  | 2.52103  | 0.12334  | -0.37285 |
| C  | 0.13535  | -3.48455 | 1.00638  |
| H  | 4.22741  | -0.45725 | -1.35756 |
| H  | 0.88144  | -3.30992 | 1.79959  |
| H  | -1.78084 | -2.73606 | 0.38203  |
| H  | -1.62047 | -2.84594 | 2.12252  |
| H  | -0.21927 | -4.52455 | 1.14886  |
| Ni | 1.53772  | -1.56701 | -0.31287 |
| Cs | -3.2291  | 0.62921  | -0.75018 |
| C  | 0.75767  | -3.2729  | -0.3499  |
| H  | 0.03706  | -3.40497 | -1.17399 |
| C  | 2.15081  | -3.37948 | -0.67952 |
| H  | 2.42911  | -3.70519 | -1.68922 |

|                                          |                |          |                             |
|------------------------------------------|----------------|----------|-----------------------------|
| H                                        | 2.85923        | -3.73505 | 0.08207                     |
| Zero-point correction=                   |                |          | 0.241161 (Hartree/Particle) |
| Thermal correction to Energy=            |                |          | 0.263280                    |
| Thermal correction to Enthalpy=          |                |          | 0.264367                    |
| Thermal correction to Gibbs Free Energy= |                |          | 0.182661                    |
| SCF Done: E(RwB97XD) =                   | -2254.74018855 |          |                             |

A-2

|    |          |          |          |
|----|----------|----------|----------|
| C  | -0.89705 | -2.60583 | -1.84737 |
| C  | -0.00944 | -1.41268 | -1.51984 |
| O  | 1.17045  | -1.6549  | -1.15705 |
| N  | -0.59527 | -0.21501 | -1.60807 |
| C  | 0.09792  | 0.94531  | -1.36678 |
| C  | -0.54952 | 1.9396   | -0.55248 |
| C  | 1.34817  | 1.26432  | -1.89873 |
| C  | 0.08873  | 3.18569  | -0.29283 |
| C  | 1.96421  | 2.50078  | -1.64467 |
| H  | 1.84391  | 0.53417  | -2.53677 |
| C  | -2.36981 | 2.53392  | 0.76316  |
| C  | -0.58169 | 4.1112   | 0.54418  |
| C  | 1.35972  | 3.45237  | -0.85203 |
| H  | 2.93922  | 2.70645  | -2.08869 |
| C  | -1.80565 | 3.78461  | 1.0708   |
| H  | -0.11189 | 5.07208  | 0.75569  |
| H  | 1.83852  | 4.41035  | -0.64852 |
| H  | -2.35012 | 4.47346  | 1.71356  |
| N  | -1.77388 | 1.63194  | -0.00845 |
| C  | -2.36145 | -2.32515 | -2.16221 |
| H  | -3.34584 | 2.2552   | 1.16197  |
| H  | -2.40749 | -1.5994  | -2.98913 |
| H  | -0.81704 | -3.30383 | -0.9969  |
| H  | -0.42236 | -3.13297 | -2.69237 |
| H  | -2.80939 | -3.2575  | -2.55165 |
| Ni | -2.32359 | -0.26359 | -0.18208 |
| P  | -1.33261 | -0.98348 | 1.67533  |
| C  | 0.01721  | 0.1157   | 2.30532  |
| H  | 0.52148  | -0.2998  | 3.19115  |
| H  | 0.75809  | 0.27937  | 1.51002  |
| H  | -0.40043 | 1.09768  | 2.57027  |
| C  | -0.47082 | -2.61411 | 1.79467  |
| H  | 0.33491  | -2.65073 | 1.04771  |
| H  | -0.04382 | -2.78106 | 2.79561  |
| H  | -1.17453 | -3.42954 | 1.57661  |
| C  | -2.37249 | -1.07603 | 3.19762  |

|                                          |                |          |                             |
|------------------------------------------|----------------|----------|-----------------------------|
| H                                        | -3.16402       | -1.82505 | 3.05615                     |
| H                                        | -1.79025       | -1.34029 | 4.09369                     |
| H                                        | -2.8604        | -0.10512 | 3.36406                     |
| Cs                                       | 3.64872        | -0.66372 | 0.34919                     |
| C                                        | -3.1965        | -1.79959 | -1.00868                    |
| H                                        | -3.50998       | -2.56263 | -0.28198                    |
| C                                        | -4.00753       | -0.65025 | -1.18898                    |
| H                                        | -4.91269       | -0.51116 | -0.58851                    |
| H                                        | -4.04911       | -0.17063 | -2.17401                    |
| Zero-point correction=                   |                |          | 0.354012 (Hartree/Particle) |
| Thermal correction to Energy=            |                |          | 0.386371                    |
| Thermal correction to Enthalpy=          |                |          | 0.387458                    |
| Thermal correction to Gibbs Free Energy= |                |          | 0.285304                    |
| SCF Done: E(RwB97XD) =                   | -2715.87480708 |          |                             |

A-3

|    |          |          |          |
|----|----------|----------|----------|
| C  | -0.67381 | -3.0139  | 1.08232  |
| C  | -0.74143 | -1.51422 | 1.34535  |
| O  | -1.73153 | -1.10899 | 2.00598  |
| N  | 0.19783  | -0.72623 | 0.81494  |
| C  | 0.13929  | 0.63704  | 1.12597  |
| C  | -0.29233 | 1.59747  | 0.1508   |
| C  | 0.56232  | 1.10885  | 2.35966  |
| C  | -0.24239 | 2.98971  | 0.46715  |
| C  | 0.5985   | 2.48206  | 2.66496  |
| H  | 0.89034  | 0.3795   | 3.10155  |
| C  | -1.07729 | 2.04617  | -1.96754 |
| C  | -0.63549 | 3.90489  | -0.5372  |
| C  | 0.20698  | 3.41842  | 1.73741  |
| H  | 0.94472  | 2.79859  | 3.64862  |
| C  | -1.04831 | 3.44169  | -1.75927 |
| H  | -0.59657 | 4.97344  | -0.32164 |
| H  | 0.23602  | 4.48565  | 1.95777  |
| H  | -1.35024 | 4.11901  | -2.55543 |
| N  | -0.72322 | 1.15579  | -1.06448 |
| C  | 0.63505  | -3.63666 | 0.61165  |
| H  | -1.41424 | 1.65616  | -2.93186 |
| H  | 1.41774  | -3.49263 | 1.37585  |
| H  | -1.45408 | -3.22281 | 0.32609  |
| H  | -1.03084 | -3.5008  | 2.00168  |
| H  | 0.4784   | -4.73113 | 0.54414  |
| Ni | 1.716    | -1.25915 | -0.33935 |
| Cs | -3.59604 | -0.45141 | -0.41202 |
| C  | 1.08285  | -3.04702 | -0.69835 |

|                                          |                |          |                             |
|------------------------------------------|----------------|----------|-----------------------------|
| H                                        | 0.30348        | -3.05316 | -1.47567                    |
| C                                        | 2.43257        | -2.90997 | -1.11621                    |
| H                                        | 2.67417        | -2.89396 | -2.18509                    |
| H                                        | 3.24289        | -3.31471 | -0.4949                     |
| P                                        | 3.27873        | 0.2587   | -0.41757                    |
| C                                        | 2.97329        | 2.02605  | -0.87066                    |
| H                                        | 3.91714        | 2.58277  | -0.97021                    |
| H                                        | 2.42554        | 2.0894   | -1.82107                    |
| H                                        | 2.36439        | 2.51023  | -0.09515                    |
| C                                        | 4.67293        | -0.10815 | -1.56972                    |
| H                                        | 4.29618        | -0.15962 | -2.60056                    |
| H                                        | 5.46661        | 0.65236  | -1.5207                     |
| H                                        | 5.10446        | -1.0878  | -1.32295                    |
| C                                        | 4.22736        | 0.51229  | 1.14562                     |
| H                                        | 4.6448         | -0.44512 | 1.48535                     |
| H                                        | 5.04956        | 1.23228  | 1.01765                     |
| H                                        | 3.5523         | 0.88208  | 1.93005                     |
| Zero-point correction=                   |                |          | 0.354539 (Hartree/Particle) |
| Thermal correction to Energy=            |                |          | 0.387141                    |
| Thermal correction to Enthalpy=          |                |          | 0.388228                    |
| Thermal correction to Gibbs Free Energy= |                |          | 0.283372                    |
| SCF Done: E(RwB97XD) =                   | -2715.88452204 |          |                             |

Add

|                               |          |          |                             |
|-------------------------------|----------|----------|-----------------------------|
| C                             | 2.78769  | -0.99664 | 0.                          |
| C                             | 1.42695  | -1.27436 | -0.00001                    |
| C                             | 0.48236  | -0.23841 | -0.00002                    |
| C                             | 0.93832  | 1.08938  | 0.                          |
| C                             | 2.29664  | 1.36562  | 0.00003                     |
| C                             | 3.22522  | 0.32442  | 0.00004                     |
| H                             | 3.50848  | -1.81248 | -0.00003                    |
| H                             | 1.07982  | -2.30781 | -0.00004                    |
| H                             | 0.22209  | 1.90989  | -0.00005                    |
| H                             | 2.63781  | 2.39943  | 0.00007                     |
| H                             | 4.29117  | 0.54629  | 0.00009                     |
| C                             | -0.92981 | -0.58278 | -0.00001                    |
| H                             | -1.14603 | -1.65647 | 0.00013                     |
| C                             | -1.98467 | 0.25621  | -0.00017                    |
| H                             | -1.88637 | 1.34267  | -0.00033                    |
| C                             | -3.32913 | -0.28778 | 0.00002                     |
| O                             | -4.3512  | 0.38083  | 0.0001                      |
| H                             | -3.37878 | -1.40206 | 0.00007                     |
| Zero-point correction=        |          |          | 0.143327 (Hartree/Particle) |
| Thermal correction to Energy= |          |          | 0.154353                    |

Thermal correction to Enthalpy= 0.155440  
Thermal correction to Gibbs Free Energy= 0.102389  
SCF Done: E(RwB97XD) = -422.974051558

Add-H<sup>-</sup>

|   |          |          |          |
|---|----------|----------|----------|
| C | -2.74903 | -0.65998 | -0.12357 |
| C | -1.50909 | -1.25361 | 0.11261  |
| C | -0.35644 | -0.48112 | 0.26018  |
| C | -0.47752 | 0.9113   | 0.16404  |
| C | -1.71125 | 1.50866  | -0.05916 |
| C | -2.85581 | 0.72374  | -0.20752 |
| H | -3.635   | -1.28415 | -0.24111 |
| H | -1.43309 | -2.3406  | 0.18212  |
| H | 0.42165  | 1.5198   | 0.27732  |
| H | -1.78451 | 2.59462  | -0.11904 |
| H | -3.82329 | 1.19171  | -0.38647 |
| C | 1.00083  | -1.10058 | 0.49748  |
| H | 1.406    | -0.68983 | 1.43788  |
| C | 2.00638  | -0.82565 | -0.58666 |
| H | 1.95033  | -1.40133 | -1.51381 |
| C | 2.91981  | 0.19485  | -0.49001 |
| O | 3.10419  | 1.02602  | 0.46005  |
| H | 3.59403  | 0.27875  | -1.38759 |
| H | 0.8631   | -2.18277 | 0.6661   |

Zero-point correction= 0.152986 (Hartree/Particle)  
Thermal correction to Energy= 0.164186  
Thermal correction to Enthalpy= 0.165273  
Thermal correction to Gibbs Free Energy= 0.111996  
SCF Done: E(RwB97XD) = -423.692115676

Add-H<sub>2</sub>

|   |          |          |          |
|---|----------|----------|----------|
| C | -2.5117  | 1.20344  | 0.08462  |
| C | -1.14852 | 1.20059  | -0.19477 |
| C | -0.45003 | -0.00025 | -0.34033 |
| C | -1.14881 | -1.20086 | -0.19425 |
| C | -2.51198 | -1.20326 | 0.08512  |
| C | -3.19821 | 0.00021  | 0.22503  |
| H | -3.04114 | 2.14972  | 0.19015  |
| H | -0.61286 | 2.14522  | -0.30576 |
| H | -0.61335 | -2.14565 | -0.30483 |
| H | -3.04169 | -2.14935 | 0.19104  |
| H | -4.26571 | 0.00036  | 0.44088  |
| C | 1.03196  | -0.00041 | -0.5878  |
| H | 1.32124  | -0.88225 | -1.17735 |

|                                          |                |          |                             |
|------------------------------------------|----------------|----------|-----------------------------|
| C                                        | 1.81134        | 0.00056  | 0.71991                     |
| H                                        | 1.55067        | -0.87133 | 1.34425                     |
| C                                        | 3.29382        | 0.00025  | 0.55135                     |
| O                                        | 3.86891        | -0.00039 | -0.51742                    |
| H                                        | 3.87231        | 0.00065  | 1.50338                     |
| H                                        | 1.32111        | 0.88062  | -1.17864                    |
| H                                        | 1.55092        | 0.87349  | 1.34288                     |
| Zero-point correction=                   |                |          | 0.165892 (Hartree/Particle) |
| Thermal correction to Energy=            |                |          | 0.177655                    |
| Thermal correction to Enthalpy=          |                |          | 0.178742                    |
| Thermal correction to Gibbs Free Energy= |                |          | 0.123191                    |
| SCF Done: E(RwB97XD) =                   | -424.202260221 |          |                             |

B

|    |          |          |          |
|----|----------|----------|----------|
| Ni | 0.03214  | -0.85542 | 0.02081  |
| P  | -2.13721 | -0.97058 | 0.0439   |
| C  | -2.92157 | -2.45346 | 0.77566  |
| H  | -4.01521 | -2.41831 | 0.67275  |
| H  | -2.53975 | -3.35085 | 0.27317  |
| H  | -2.66618 | -2.52475 | 1.84053  |
| C  | -2.74832 | -1.01103 | -1.6808  |
| H  | -2.31056 | -1.86838 | -2.20779 |
| H  | -3.84406 | -1.09332 | -1.70768 |
| H  | -2.44724 | -0.09349 | -2.20269 |
| C  | -3.12975 | 0.38408  | 0.77454  |
| H  | -2.89488 | 0.49691  | 1.84068  |
| H  | -2.90148 | 1.33177  | 0.27039  |
| H  | -4.20271 | 0.17108  | 0.66871  |
| H  | 0.08065  | -2.40976 | 0.0523   |
| P  | 2.20292  | -0.84823 | -0.04281 |
| C  | 2.86726  | -0.86275 | 1.66263  |
| H  | 3.96601  | -0.89393 | 1.6558   |
| H  | 2.54081  | 0.03962  | 2.19565  |
| H  | 2.48477  | -1.74003 | 2.19952  |
| C  | 3.10121  | 0.56027  | -0.79254 |
| H  | 2.82404  | 1.49467  | -0.28817 |
| H  | 4.1865   | 0.41204  | -0.70407 |
| H  | 2.84267  | 0.65441  | -1.85505 |
| C  | 3.04255  | -2.28445 | -0.80582 |
| H  | 2.74392  | -3.19961 | -0.27939 |
| H  | 2.73811  | -2.38156 | -1.85561 |
| H  | 4.13545  | -2.17883 | -0.75889 |
| C  | -0.03354 | 1.0643   | -0.00072 |
| C  | 0.04232  | 1.80599  | 1.18998  |

|                                          |                |         |                             |
|------------------------------------------|----------------|---------|-----------------------------|
| C                                        | -0.16742       | 1.79757 | -1.1913                     |
| C                                        | -0.01224       | 3.2004  | 1.19656                     |
| H                                        | 0.13623        | 1.28344 | 2.14747                     |
| C                                        | -0.22962       | 3.1919  | -1.19646                    |
| H                                        | -0.22109       | 1.26957 | -2.14888                    |
| C                                        | -0.15074       | 3.90216 | 0.0002                      |
| H                                        | 0.05084        | 3.74366 | 2.14093                     |
| H                                        | -0.33731       | 3.72876 | -2.14046                    |
| H                                        | -0.19604       | 4.99117 | 0.00039                     |
| Zero-point correction=                   |                |         | 0.324337 (Hartree/Particle) |
| Thermal correction to Energy=            |                |         | 0.352650                    |
| Thermal correction to Enthalpy=          |                |         | 0.353737                    |
| Thermal correction to Gibbs Free Energy= |                |         | 0.261760                    |
| SCF Done: E(RwB97XD) =                   | -2662.91574263 |         |                             |

|    |   |          |          |          |
|----|---|----------|----------|----------|
| C  |   |          |          |          |
| C  | 0 | 0.44969  | -3.2511  | 0.75718  |
| C  | 0 | -0.52177 | -2.0878  | 0.63187  |
| O  | 0 | -1.74014 | -2.34882 | 0.44282  |
| N  | 0 | 0.00241  | -0.8753  | 0.74979  |
| C  | 0 | -0.88447 | 0.19566  | 0.83023  |
| C  | 0 | -1.29853 | 0.93896  | -0.32701 |
| C  | 0 | -1.36252 | 0.61474  | 2.06487  |
| C  | 0 | -2.09891 | 2.11278  | -0.1662  |
| C  | 0 | -2.18126 | 1.7493   | 2.21192  |
| H  | 0 | -1.06477 | 0.04324  | 2.94503  |
| C  | 0 | -1.31497 | 1.16799  | -2.61944 |
| C  | 0 | -2.46361 | 2.82279  | -1.33627 |
| C  | 0 | -2.53403 | 2.50858  | 1.11971  |
| H  | 0 | -2.52153 | 2.03365  | 3.20757  |
| C  | 0 | -2.0708  | 2.36118  | -2.56527 |
| H  | 0 | -3.06132 | 3.7301   | -1.23739 |
| H  | 0 | -3.15004 | 3.40248  | 1.22131  |
| H  | 0 | -2.33485 | 2.883    | -3.48285 |
| N  | 0 | -0.94393 | 0.48369  | -1.56039 |
| C  | 0 | 1.51167  | -3.09156 | 1.84626  |
| H  | 0 | -1.00785 | 0.76968  | -3.59045 |
| H  | 0 | 1.06775  | -2.65066 | 2.75352  |
| H  | 0 | 0.94817  | -3.41094 | -0.21434 |
| H  | 0 | -0.15656 | -4.14727 | 0.94502  |
| H  | 0 | 1.86714  | -4.09782 | 2.12969  |
| Ni | 0 | 2.142    | -0.28856 | 1.01105  |
| P  | 0 | 2.34664  | 1.85993  | 0.68545  |
| C  | 0 | 1.30155  | 3.04608  | 1.62124  |



|                                          |                |          |          |                             |
|------------------------------------------|----------------|----------|----------|-----------------------------|
| H                                        | 0              | 1.64485  | 4.07752  | 1.45541                     |
| H                                        | 0              | 0.25452  | 2.97054  | 1.29887                     |
| H                                        | 0              | 1.34864  | 2.81698  | 2.69348                     |
| C                                        | 0              | 2.20639  | 2.57224  | -1.00295                    |
| H                                        | 0              | 1.20025  | 2.38287  | -1.40398                    |
| H                                        | 0              | 2.37974  | 3.65765  | -0.97797                    |
| H                                        | 0              | 2.9363   | 2.10722  | -1.67746                    |
| C                                        | 0              | 4.02459  | 2.40703  | 1.18651                     |
| H                                        | 0              | 4.78275  | 1.88698  | 0.58696                     |
| H                                        | 0              | 4.149    | 3.49149  | 1.05299                     |
| H                                        | 0              | 4.18464  | 2.15347  | 2.24322                     |
| Cs                                       | 0              | -4.27696 | -0.90171 | -0.5197                     |
| C                                        | 0              | 2.70088  | -2.29342 | 1.40982                     |
| H                                        | 0              | 3.15528  | -2.63346 | 0.477                       |
| C                                        | 0              | 3.43059  | -1.44921 | 2.21832                     |
| H                                        | 0              | 4.42995  | -1.11996 | 1.92647                     |
| H                                        | 0              | 3.18001  | -1.32261 | 3.27065                     |
| H                                        | 0              | 1.7415   | 0.2137   | 2.41727                     |
| C                                        | 0              | 2.90066  | -0.5711  | -0.7771                     |
| C                                        | 0              | 2.1099   | -0.85276 | -1.90267                    |
| C                                        | 0              | 4.28708  | -0.50361 | -0.99715                    |
| C                                        | 0              | 2.66271  | -1.03028 | -3.17176                    |
| H                                        | 0              | 1.02591  | -0.90807 | -1.7838                     |
| C                                        | 0              | 4.8539   | -0.67591 | -2.26228                    |
| H                                        | 0              | 4.961    | -0.30263 | -0.15716                    |
| C                                        | 0              | 4.04046  | -0.93581 | -3.36304                    |
| H                                        | 0              | 2.01123  | -1.24254 | -4.02245                    |
| H                                        | 0              | 5.93602  | -0.60498 | -2.38868                    |
| H                                        | 0              | 4.4746   | -1.06828 | -4.35435                    |
| Zero-point correction=                   |                |          |          | 0.451889 (Hartree/Particle) |
| Thermal correction to Energy=            |                |          |          | 0.492521                    |
| Thermal correction to Enthalpy=          |                |          |          | 0.493607                    |
| Thermal correction to Gibbs Free Energy= |                |          |          | 0.371425                    |
| SCF Done: E(RwB97XD) =                   | -2948.09067862 |          |          |                             |

C1-1

|   |   |          |          |          |
|---|---|----------|----------|----------|
| C | 0 | -0.22797 | -2.48925 | -0.95056 |
| C | 0 | -0.84132 | -1.48327 | -0.00546 |
| O | 0 | -1.87749 | -1.76785 | 0.631    |
| N | 0 | -0.10583 | -0.36538 | 0.13152  |
| C | 0 | -0.58959 | 0.66318  | 0.93145  |
| C | 0 | -1.83351 | 1.33357  | 0.64686  |
| C | 0 | 0.18135  | 1.15787  | 1.97592  |
| C | 0 | -2.24917 | 2.42291  | 1.4724   |

|    |   |          |          |          |
|----|---|----------|----------|----------|
| C  | 0 | -0.23102 | 2.2446   | 2.77106  |
| H  | 0 | 1.14291  | 0.68031  | 2.17296  |
| C  | 0 | -3.70369 | 1.55053  | -0.67813 |
| C  | 0 | -3.4909  | 3.03629  | 1.17677  |
| C  | 0 | -1.43463 | 2.8658   | 2.541    |
| H  | 0 | 0.41453  | 2.58344  | 3.58105  |
| C  | 0 | -4.22978 | 2.59934  | 0.10917  |
| H  | 0 | -3.83357 | 3.86068  | 1.80375  |
| H  | 0 | -1.77174 | 3.70179  | 3.15433  |
| H  | 0 | -5.18524 | 3.05106  | -0.14951 |
| N  | 0 | -2.56541 | 0.94098  | -0.43201 |
| C  | 0 | 0.94711  | -3.21679 | -0.27999 |
| H  | 0 | -4.25722 | 1.2145   | -1.55875 |
| H  | 0 | 0.53486  | -4.00966 | 0.37672  |
| H  | 0 | 0.14056  | -1.96751 | -1.84655 |
| H  | 0 | -1.00099 | -3.20516 | -1.26413 |
| H  | 0 | 1.50593  | -3.74288 | -1.07055 |
| Ni | 0 | 1.86157  | -0.4752  | -0.2087  |
| P  | 0 | 2.03262  | 1.59522  | -1.12287 |
| C  | 0 | 0.53912  | 2.58957  | -1.54016 |
| H  | 0 | 0.81747  | 3.49503  | -2.09805 |
| H  | 0 | -0.15354 | 1.99402  | -2.14885 |
| H  | 0 | 0.01994  | 2.89094  | -0.62066 |
| C  | 0 | 2.92332  | 1.64717  | -2.73075 |
| H  | 0 | 2.41776  | 0.99939  | -3.45972 |
| H  | 0 | 2.96019  | 2.67091  | -3.12914 |
| H  | 0 | 3.94799  | 1.27698  | -2.59824 |
| C  | 0 | 2.99603  | 2.83664  | -0.16608 |
| H  | 0 | 4.01484  | 2.46485  | 0.00303  |
| H  | 0 | 3.05141  | 3.79356  | -0.70484 |
| H  | 0 | 2.52264  | 3.00621  | 0.81085  |
| Cs | 0 | -3.85143 | -0.70808 | 2.71544  |
| C  | 0 | 1.89939  | -2.31886 | 0.51732  |
| H  | 0 | 2.90609  | -2.75757 | 0.43682  |
| C  | 0 | 1.55993  | -2.27762 | 2.00124  |
| H  | 0 | 1.5813   | -3.28848 | 2.45511  |
| H  | 0 | 0.55878  | -1.86546 | 2.20049  |
| H  | 0 | 2.28165  | -1.66447 | 2.56621  |
| C  | 0 | 3.72738  | -0.65383 | -0.42512 |
| C  | 0 | 4.30193  | -1.28717 | -1.54397 |
| C  | 0 | 4.62833  | -0.16324 | 0.53792  |
| C  | 0 | 5.68191  | -1.40451 | -1.70438 |
| H  | 0 | 3.64868  | -1.70056 | -2.3203  |
| C  | 0 | 6.01227  | -0.28098 | 0.39145  |

|                                          |                |         |          |                             |
|------------------------------------------|----------------|---------|----------|-----------------------------|
| H                                        | 0              | 4.24047 | 0.33791  | 1.43232                     |
| C                                        | 0              | 6.54973 | -0.89984 | -0.7353                     |
| H                                        | 0              | 6.08567 | -1.89748 | -2.59085                    |
| H                                        | 0              | 6.67549 | 0.1148   | 1.16308                     |
| H                                        | 0              | 7.62917 | -0.99216 | -0.85567                    |
| Zero-point correction=                   |                |         |          | 0.456386 (Hartree/Particle) |
| Thermal correction to Energy=            |                |         |          | 0.496619                    |
| Thermal correction to Enthalpy=          |                |         |          | 0.497705                    |
| Thermal correction to Gibbs Free Energy= |                |         |          | 0.376672                    |
| SCF Done: E(RwB97XD) =                   | -2948.12650765 |         |          |                             |

C'1-1

|    |   |          |          |          |
|----|---|----------|----------|----------|
| C  | 0 | -0.39557 | -0.8737  | 3.08063  |
| C  | 0 | -1.40184 | -0.04161 | 3.89903  |
| C  | 0 | -1.64058 | 1.33979  | 3.3783   |
| C  | 0 | -2.831   | 1.84673  | 3.05793  |
| H  | 0 | -3.74153 | 1.24564  | 3.12197  |
| H  | 0 | -2.94632 | 2.87048  | 2.6989   |
| Ni | 0 | -0.91082 | 1.08574  | 0.35724  |
| C  | 0 | -0.38372 | 2.76596  | -0.31041 |
| C  | 0 | -0.28346 | 3.86691  | 0.54935  |
| C  | 0 | 0.10395  | 5.12247  | 0.07876  |
| C  | 0 | 0.41717  | 5.30073  | -1.26764 |
| C  | 0 | 0.33492  | 4.21447  | -2.13592 |
| C  | 0 | -0.06692 | 2.96473  | -1.66013 |
| H  | 0 | -0.14486 | 2.13316  | -2.36723 |
| H  | 0 | 0.57874  | 4.34188  | -3.19186 |
| H  | 0 | 0.72526  | 6.27892  | -1.63645 |
| H  | 0 | 0.16786  | 5.9655   | 0.76851  |
| H  | 0 | -0.5083  | 3.74849  | 1.61323  |
| N  | 0 | -2.63424 | 1.15653  | -0.47989 |
| C  | 0 | -3.23808 | 2.20208  | -1.02615 |
| C  | 0 | -4.42402 | 2.09044  | -1.77004 |
| C  | 0 | -4.97668 | 0.84965  | -1.96194 |
| C  | 0 | -4.37689 | -0.28522 | -1.37192 |
| C  | 0 | -4.90876 | -1.5899  | -1.49226 |
| C  | 0 | -4.28688 | -2.62289 | -0.83511 |
| C  | 0 | -3.14146 | -2.42233 | -0.0375  |
| C  | 0 | -2.57578 | -1.15539 | 0.11227  |
| N  | 0 | -1.52948 | -0.74388 | 0.92487  |
| C  | 0 | -1.04255 | -1.56012 | 1.89793  |
| O  | 0 | -1.14207 | -2.80194 | 1.90638  |
| Cs | 0 | 0.52189  | -3.10674 | -0.88623 |
| C  | 0 | 5.06863  | -0.3848  | -0.35618 |

|                                          |                |          |          |                             |
|------------------------------------------|----------------|----------|----------|-----------------------------|
| C                                        | 0              | 5.20753  | 0.99701  | -0.52206                    |
| C                                        | 0              | 6.45548  | 1.60362  | -0.44113                    |
| C                                        | 0              | 7.59143  | 0.8375   | -0.17991                    |
| C                                        | 0              | 7.46557  | -0.53694 | -0.00625                    |
| C                                        | 0              | 6.21221  | -1.14069 | -0.09666                    |
| H                                        | 0              | 6.11868  | -2.22004 | 0.03815                     |
| H                                        | 0              | 8.3459   | -1.14468 | 0.20187                     |
| H                                        | 0              | 8.56916  | 1.31278  | -0.11024                    |
| H                                        | 0              | 6.5443   | 2.68097  | -0.57893                    |
| H                                        | 0              | 4.31703  | 1.59898  | -0.71395                    |
| C                                        | 0              | 3.70277  | -1.02819 | -0.45349                    |
| C                                        | 0              | 2.7132   | -0.49554 | 0.54148                     |
| C                                        | 0              | 1.67271  | 0.29601  | 0.18457                     |
| O                                        | 0              | 0.85096  | 0.90502  | 1.00318                     |
| H                                        | 0              | 1.51696  | 0.46607  | -0.90176                    |
| H                                        | 0              | 2.91728  | -0.65934 | 1.60463                     |
| H                                        | 0              | 3.83302  | -2.12013 | -0.35249                    |
| H                                        | 0              | 3.30382  | -0.859   | -1.47007                    |
| C                                        | 0              | -3.20189 | -0.08374 | -0.60463                    |
| H                                        | 0              | -2.7091  | -3.26047 | 0.49649                     |
| H                                        | 0              | -4.68877 | -3.63294 | -0.91442                    |
| H                                        | 0              | -5.80381 | -1.74733 | -2.0928                     |
| H                                        | 0              | -5.88408 | 0.72188  | -2.55222                    |
| H                                        | 0              | -4.87267 | 2.98654  | -2.19146                    |
| H                                        | 0              | -2.76113 | 3.1698   | -0.88638                    |
| H                                        | 0              | -0.74862 | 1.9698   | 3.28627                     |
| H                                        | 0              | -2.35929 | -0.58083 | 3.98532                     |
| H                                        | 0              | -1.00029 | 0.04154  | 4.92184                     |
| H                                        | 0              | 0.02387  | -1.66441 | 3.7153                      |
| H                                        | 0              | 0.42042  | -0.22545 | 2.73624                     |
| Zero-point correction=                   |                |          |          | 0.487288 (Hartree/Particle) |
| Thermal correction to Energy=            |                |          |          | 0.530490                    |
| Thermal correction to Enthalpy=          |                |          |          | 0.531577                    |
| Thermal correction to Gibbs Free Energy= |                |          |          | 0.399061                    |
| SCF Done: E(RwB97XD) =                   | -2909.99375295 |          |          |                             |

C1-2

|   |          |          |          |
|---|----------|----------|----------|
| C | -1.11504 | -2.00193 | -2.67023 |
| C | 0.01056  | -1.1291  | -2.12928 |
| O | 1.15769  | -1.63397 | -2.10938 |
| N | -0.34286 | 0.08541  | -1.69169 |
| C | 0.58263  | 1.02425  | -1.31345 |
| C | 0.16602  | 1.98287  | -0.322   |
| C | 1.86115  | 1.1888   | -1.85198 |

|                                          |                |          |                             |
|------------------------------------------|----------------|----------|-----------------------------|
| C                                        | 1.04906        | 3.01052  | 0.11401                     |
| C                                        | 2.71933        | 2.21646  | -1.42492                    |
| H                                        | 2.19631        | 0.49472  | -2.61829                    |
| C                                        | -1.50773       | 2.74734  | 1.09961                     |
| C                                        | 0.57968        | 3.9111   | 1.09903                     |
| C                                        | 2.34326        | 3.10809  | -0.44586                    |
| H                                        | 3.70532        | 2.2995   | -1.88305                    |
| C                                        | -0.69209       | 3.78146  | 1.59289                     |
| H                                        | 1.24135        | 4.70517  | 1.44576                     |
| H                                        | 3.0101         | 3.90046  | -0.1071                     |
| H                                        | -1.08574       | 4.4619   | 2.34428                     |
| N                                        | -1.099         | 1.88575  | 0.18647                     |
| C                                        | -2.54038       | -1.46161 | -2.65483                    |
| H                                        | -2.52974       | 2.62982  | 1.45885                     |
| H                                        | -2.61521       | -0.52461 | -3.22556                    |
| H                                        | -1.07485       | -2.9511  | -2.10877                    |
| H                                        | -0.82879       | -2.27001 | -3.69913                    |
| H                                        | -3.18224       | -2.19538 | -3.17378                    |
| Ni                                       | -2.20094       | 0.40159  | -0.52177                    |
| Cs                                       | 2.91862        | -1.20587 | 0.49362                     |
| C                                        | -3.0762        | -1.26387 | -1.26675                    |
| H                                        | -2.85347       | -2.08144 | -0.57631                    |
| C                                        | -4.07106       | -0.36528 | -0.90522                    |
| H                                        | -4.57808       | -0.47916 | 0.05546                     |
| H                                        | -4.60185       | 0.22514  | -1.64979                    |
| H                                        | -2.68873       | 1.40551  | -1.61063                    |
| C                                        | -1.7587        | -0.64502 | 1.07714                     |
| C                                        | -0.76004       | -1.62598 | 1.16515                     |
| C                                        | -2.46831       | -0.37568 | 2.25715                     |
| C                                        | -0.47567       | -2.29468 | 2.35845                     |
| H                                        | -0.19569       | -1.90171 | 0.26813                     |
| C                                        | -2.19729       | -1.03506 | 3.45821                     |
| H                                        | -3.26695       | 0.37411  | 2.24937                     |
| C                                        | -1.19313       | -1.99906 | 3.51593                     |
| H                                        | 0.3009         | -3.06295 | 2.38277                     |
| H                                        | -2.77602       | -0.79872 | 4.35294                     |
| H                                        | -0.97961       | -2.52112 | 4.44869                     |
| Zero-point correction=                   |                |          | 0.339283 (Hartree/Particle) |
| Thermal correction to Energy=            |                |          | 0.368966                    |
| Thermal correction to Enthalpy=          |                |          | 0.370052                    |
| Thermal correction to Gibbs Free Energy= |                |          | 0.273448                    |
| SCF Done: E(RwB97XD) =                   | -2486.94794318 |          |                             |

|    |          |          |          |
|----|----------|----------|----------|
| C  | 0.23536  | -2.35408 | -1.98949 |
| C  | -0.687   | -1.57342 | -1.05983 |
| O  | -1.91846 | -1.81006 | -1.16536 |
| N  | -0.09707 | -0.78501 | -0.17293 |
| C  | -0.87561 | 0.0174   | 0.6295   |
| C  | -1.63723 | 1.12086  | 0.09135  |
| C  | -0.89097 | -0.14831 | 2.01225  |
| C  | -2.38464 | 1.9628   | 0.97095  |
| C  | -1.62716 | 0.69174  | 2.86767  |
| H  | -0.31571 | -0.97488 | 2.43274  |
| C  | -2.34678 | 2.30667  | -1.75035 |
| C  | -3.15321 | 2.99973  | 0.38764  |
| C  | -2.373   | 1.73342  | 2.3667   |
| H  | -1.60644 | 0.50281  | 3.94115  |
| C  | -3.14727 | 3.17199  | -0.97144 |
| H  | -3.73944 | 3.65121  | 1.03755  |
| H  | -2.95277 | 2.38666  | 3.01926  |
| H  | -3.72648 | 3.95902  | -1.45021 |
| N  | -1.62327 | 1.32714  | -1.25474 |
| C  | 1.6467   | -1.87242 | -2.19738 |
| H  | -2.30627 | 2.44613  | -2.8336  |
| H  | 2.26427  | -2.47459 | -0.41775 |
| H  | -0.27509 | -2.40171 | -2.96608 |
| H  | 0.25114  | -3.39206 | -1.61929 |
| H  | 2.32565  | -2.6343  | -2.593   |
| Ni | 2.43139  | -0.96637 | -0.51587 |
| P  | 3.10867  | -1.24407 | 1.51234  |
| C  | 2.40736  | -2.66888 | 2.42753  |
| H  | 2.72951  | -2.6737  | 3.47833  |
| H  | 1.31043  | -2.63754 | 2.38709  |
| H  | 2.73378  | -3.59977 | 1.94604  |
| C  | 2.83471  | 0.12761  | 2.6983   |
| H  | 3.42066  | 1.0073   | 2.4039   |
| H  | 1.77308  | 0.41013  | 2.70445  |
| H  | 3.13046  | -0.17804 | 3.71194  |
| C  | 4.90614  | -1.54719 | 1.68041  |
| H  | 5.46701  | -0.67368 | 1.32502  |
| H  | 5.17189  | -1.73778 | 2.72991  |
| H  | 5.19396  | -2.41532 | 1.07361  |
| Cs | -4.57744 | -0.81928 | 0.00762  |
| C  | 1.98885  | -0.54464 | -2.46835 |
| H  | 1.19676  | 0.20731  | -2.40799 |
| C  | 3.16664  | -0.21115 | -3.33666 |
| H  | 3.97406  | -0.94892 | -3.21501 |

|                                          |                |          |                             |
|------------------------------------------|----------------|----------|-----------------------------|
| H                                        | 3.58246        | 0.77956  | -3.11286                    |
| H                                        | 2.88128        | -0.21222 | -4.40152                    |
| C                                        | 3.01152        | 0.88046  | -0.41377                    |
| C                                        | 2.13641        | 1.94611  | -0.14932                    |
| C                                        | 4.37172        | 1.21441  | -0.54048                    |
| C                                        | 2.58735        | 3.25806  | 0.00248                     |
| H                                        | 1.06588        | 1.74776  | -0.04672                    |
| C                                        | 4.83758        | 2.52173  | -0.38859                    |
| H                                        | 5.09968        | 0.42758  | -0.76563                    |
| C                                        | 3.94476        | 3.55455  | -0.10924                    |
| H                                        | 1.8728         | 4.05677  | 0.21058                     |
| H                                        | 5.90347        | 2.73511  | -0.4881                     |
| H                                        | 4.30108        | 4.5775   | 0.01357                     |
| Zero-point correction=                   |                |          | 0.451472 (Hartree/Particle) |
| Thermal correction to Energy=            |                |          | 0.492530                    |
| Thermal correction to Enthalpy=          |                |          | 0.493616                    |
| Thermal correction to Gibbs Free Energy= |                |          | 0.369603                    |
| SCF Done: E(RwB97XD) =                   | -2948.09202383 |          |                             |

C'1-2

|   |   |          |          |          |
|---|---|----------|----------|----------|
| C | 0 | 0.1116   | 3.31516  | 0.02519  |
| C | 0 | 0.79627  | 2.00177  | 0.32711  |
| O | 0 | 2.0177   | 2.01783  | 0.61279  |
| N | 0 | 0.04243  | 0.89425  | 0.29007  |
| C | 0 | 0.75002  | -0.28105 | 0.59437  |
| C | 0 | 1.56687  | -0.93448 | -0.38824 |
| C | 0 | 0.67582  | -0.83656 | 1.8581   |
| C | 0 | 2.23799  | -2.14695 | -0.04479 |
| C | 0 | 1.36009  | -2.02189 | 2.19683  |
| H | 0 | 0.06263  | -0.3306  | 2.60545  |
| C | 0 | 2.44567  | -0.97414 | -2.51415 |
| C | 0 | 3.03419  | -2.7614  | -1.04131 |
| C | 0 | 2.12669  | -2.67771 | 1.26384  |
| H | 0 | 1.26951  | -2.41926 | 3.2074   |
| C | 0 | 3.14654  | -2.17824 | -2.27648 |
| H | 0 | 3.55141  | -3.69257 | -0.80572 |
| H | 0 | 2.6545   | -3.60022 | 1.50763  |
| H | 0 | 3.75184  | -2.62145 | -3.06452 |
| N | 0 | 1.68496  | -0.37462 | -1.62483 |
| C | 0 | -1.33878 | 3.37201  | 0.46242  |
| H | 0 | 2.52075  | -0.49651 | -3.49405 |
| H | 0 | -1.40808 | 3.0395   | 1.51288  |
| H | 0 | 0.17469  | 3.49754  | -1.06217 |
| H | 0 | 0.71265  | 4.10051  | 0.50527  |

|                                          |                |          |          |                             |
|------------------------------------------|----------------|----------|----------|-----------------------------|
| H                                        | 0              | -1.67034 | 4.43057  | 0.47032                     |
| Ni                                       | 0              | -1.67635 | 0.69253  | -0.6705                     |
| P                                        | 0              | -1.91771 | -1.52707 | -1.02283                    |
| C                                        | 0              | -1.4397  | -2.8992  | 0.11608                     |
| H                                        | 0              | -1.85512 | -3.85231 | -0.2428                     |
| H                                        | 0              | -0.3502  | -2.99948 | 0.18807                     |
| H                                        | 0              | -1.83654 | -2.70008 | 1.1213                      |
| C                                        | 0              | -1.26837 | -2.18088 | -2.61705                    |
| H                                        | 0              | -0.17156 | -2.23581 | -2.5816                     |
| H                                        | 0              | -1.66744 | -3.18318 | -2.83093                    |
| H                                        | 0              | -1.54966 | -1.50099 | -3.43236                    |
| C                                        | 0              | -3.70448 | -1.93715 | -1.19092                    |
| H                                        | 0              | -4.14866 | -1.35408 | -2.0073                     |
| H                                        | 0              | -3.84929 | -3.00891 | -1.39097                    |
| H                                        | 0              | -4.23098 | -1.67538 | -0.26172                    |
| Cs                                       | 0              | 4.63973  | 0.49138  | 0.88671                     |
| C                                        | 0              | -2.25244 | 2.5565   | -0.4374                     |
| H                                        | 0              | -2.23358 | 3.05072  | -1.42527                    |
| C                                        | 0              | -3.70555 | 2.56786  | 0.05593                     |
| H                                        | 0              | -4.38199 | 2.58811  | -0.81302                    |
| H                                        | 0              | -3.90846 | 3.51028  | 0.60875                     |
| C                                        | 0              | -4.14501 | 1.41054  | 0.92521                     |
| C                                        | 0              | -3.31796 | 0.84422  | 1.90506                     |
| C                                        | 0              | -5.41996 | 0.86096  | 0.76038                     |
| C                                        | 0              | -3.74502 | -0.23556 | 2.67412                     |
| H                                        | 0              | -2.31998 | 1.24807  | 2.06919                     |
| C                                        | 0              | -5.8579  | -0.21377 | 1.53227                     |
| H                                        | 0              | -6.08051 | 1.27949  | -0.00165                    |
| C                                        | 0              | -5.01848 | -0.7728  | 2.49184                     |
| H                                        | 0              | -3.07611 | -0.65813 | 3.42466                     |
| H                                        | 0              | -6.8569  | -0.62056 | 1.37513                     |
| H                                        | 0              | -5.35284 | -1.6166  | 3.09447                     |
| H                                        | 0              | -2.84208 | 0.7188   | -1.63146                    |
| Zero-point correction=                   |                |          |          | 0.455839 (Hartree/Particle) |
| Thermal correction to Energy=            |                |          |          | 0.494999                    |
| Thermal correction to Enthalpy=          |                |          |          | 0.496086                    |
| Thermal correction to Gibbs Free Energy= |                |          |          | 0.378364                    |
| SCF Done: E(RwB97XD) =                   | -2948.12499597 |          |          |                             |

C2

|   |   |          |         |          |
|---|---|----------|---------|----------|
| C | 0 | -3.32946 | 0.37211 | 0.24684  |
| C | 0 | -4.17431 | 1.24707 | 0.95464  |
| C | 0 | -5.4194  | 1.64073 | 0.46252  |
| C | 0 | -5.86838 | 1.17155 | -0.77121 |



|                                          |   |          |          |                             |
|------------------------------------------|---|----------|----------|-----------------------------|
| C                                        | 0 | -3.81636 | -0.09095 | -0.98909                    |
| C                                        | 0 | -5.05642 | 0.30097  | -1.49644                    |
| H                                        | 0 | -3.84934 | 1.64403  | 1.92173                     |
| H                                        | 0 | -6.04417 | 2.32082  | 1.04485                     |
| H                                        | 0 | -3.21332 | -0.79028 | -1.57869                    |
| H                                        | 0 | -5.39373 | -0.0781  | -2.46318                    |
| C                                        | 0 | 2.40537  | 0.93778  | 1.6171                      |
| C                                        | 0 | 1.10843  | 0.76188  | 1.14323                     |
| C                                        | 0 | 0.46052  | 1.90242  | 0.57663                     |
| C                                        | 0 | 1.13956  | 3.14001  | 0.42878                     |
| C                                        | 0 | 2.46787  | 3.26067  | 0.89803                     |
| C                                        | 0 | 3.06668  | 2.17553  | 1.4954                      |
| H                                        | 0 | 2.92282  | 0.10091  | 2.07488                     |
| C                                        | 0 | 0.4328   | 4.20129  | -0.18272                    |
| H                                        | 0 | 2.98527  | 4.21411  | 0.79517                     |
| H                                        | 0 | 4.0808   | 2.26376  | 1.88468                     |
| C                                        | 0 | -0.8579  | 4.00429  | -0.6027                     |
| C                                        | 0 | -1.46    | 2.74918  | -0.39648                    |
| H                                        | 0 | 0.92695  | 5.16491  | -0.30876                    |
| H                                        | 0 | -1.42852 | 4.79788  | -1.07942                    |
| H                                        | 0 | -2.49233 | 2.575    | -0.6996                     |
| N                                        | 0 | -0.83554 | 1.73383  | 0.17629                     |
| N                                        | 0 | 0.34255  | -0.39828 | 1.18742                     |
| C                                        | 0 | 0.96174  | -1.59915 | 1.11147                     |
| O                                        | 0 | 2.17804  | -1.77212 | 0.89051                     |
| C                                        | 0 | -2.16024 | -1.68665 | 1.6168                      |
| C                                        | 0 | 0.10943  | -2.8287  | 1.3409                      |
| H                                        | 0 | 0.63224  | -3.66374 | 0.85338                     |
| H                                        | 0 | 0.1677   | -3.03328 | 2.42521                     |
| C                                        | 0 | -1.35522 | -2.79075 | 0.93995                     |
| H                                        | 0 | -1.44306 | -2.71748 | -0.16053                    |
| H                                        | 0 | -1.78237 | -3.78248 | 1.19358                     |
| H                                        | 0 | -1.7681  | -1.55795 | 2.64619                     |
| C                                        | 0 | -3.61813 | -2.09742 | 1.72604                     |
| H                                        | 0 | -4.07301 | -2.27051 | 0.7377                      |
| H                                        | 0 | -3.72349 | -3.0422  | 2.29339                     |
| H                                        | 0 | -4.23583 | -1.34233 | 2.23258                     |
| Ni                                       | 0 | -1.57769 | -0.02731 | 0.799                       |
| Cs                                       | 0 | 2.74201  | -0.27903 | -1.86126                    |
| H                                        | 0 | -6.83899 | 1.47859  | -1.1611                     |
| Zero-point correction=                   |   |          |          | 0.342862 (Hartree/Particle) |
| Thermal correction to Energy=            |   |          |          | 0.372740                    |
| Thermal correction to Enthalpy=          |   |          |          | 0.373826                    |
| Thermal correction to Gibbs Free Energy= |   |          |          | 0.274566                    |

SCF Done: E(RwB97XD) = -2486.99722426

|     |          |          |          |
|-----|----------|----------|----------|
| C'2 |          |          |          |
| C   | -1.38897 | -2.83971 | -1.58055 |
| C   | -2.17347 | -2.0276  | -0.57824 |
| O   | -3.35252 | -2.33813 | -0.32806 |
| N   | -1.51279 | -0.97442 | -0.03472 |
| C   | -2.13644 | -0.21003 | 0.95033  |
| C   | -1.85737 | 1.18648  | 0.90554  |
| C   | -2.97026 | -0.66489 | 1.96299  |
| C   | -2.46135 | 2.09619  | 1.80823  |
| C   | -3.55157 | 0.23661  | 2.87886  |
| H   | -3.1892  | -1.72582 | 2.04324  |
| C   | -0.72539 | 2.87689  | -0.19435 |
| C   | -2.14735 | 3.46623  | 1.64515  |
| C   | -3.32739 | 1.5931   | 2.80708  |
| H   | -4.19831 | -0.16205 | 3.6601   |
| C   | -1.29325 | 3.85677  | 0.64357  |
| H   | -2.59088 | 4.19697  | 2.32182  |
| H   | -3.78717 | 2.28363  | 3.5134   |
| H   | -1.03859 | 4.9031   | 0.49252  |
| N   | -0.99022 | 1.59103  | -0.0647  |
| C   | 0.09538  | -2.90034 | -1.27669 |
| H   | -0.02928 | 3.14694  | -0.98798 |
| H   | 0.23228  | -3.19786 | -0.22221 |
| H   | -1.54754 | -2.40304 | -2.58209 |
| H   | -1.84438 | -3.83928 | -1.60365 |
| H   | 0.55177  | -3.71142 | -1.87631 |
| Ni  | -0.08818 | -0.01733 | -0.8986  |
| Cs  | -5.40151 | -0.001   | -0.73201 |
| C   | 0.81482  | -1.59553 | -1.54977 |
| H   | 0.78381  | -1.39501 | -2.63801 |
| C   | 2.28172  | -1.68661 | -1.13697 |
| H   | 2.81915  | -0.78921 | -1.48118 |
| H   | 2.75167  | -2.535   | -1.6715  |
| C   | 2.56582  | -1.8719  | 0.33389  |
| C   | 1.98863  | -1.05652 | 1.31672  |
| C   | 3.48111  | -2.84271 | 0.75352  |
| C   | 2.32389  | -1.19804 | 2.66026  |
| H   | 1.26185  | -0.29508 | 1.01937  |
| C   | 3.82191  | -2.98974 | 2.09662  |
| H   | 3.94242  | -3.49157 | 0.00652  |
| C   | 3.24702  | -2.16311 | 3.05763  |
| H   | 1.86202  | -0.54701 | 3.40262  |

|   |         |          |          |
|---|---------|----------|----------|
| H | 4.53899 | -3.75578 | 2.39175  |
| H | 3.51046 | -2.27334 | 4.10895  |
| C | 6.86848 | 1.92707  | -0.92534 |
| C | 5.61262 | 1.6089   | -0.40761 |
| C | 5.46259 | 0.39657  | 0.27547  |
| C | 6.53792 | -0.46919 | 0.4383   |
| C | 7.78777 | -0.1413  | -0.08756 |
| C | 7.94928 | 1.05966  | -0.77067 |
| H | 7.00057 | 2.86969  | -1.45981 |
| H | 4.48325 | 0.13339  | 0.68494  |
| C | 2.15078 | 1.58448  | -1.06366 |
| O | 1.18803 | 1.06156  | -1.78395 |
| H | 1.93523 | 1.76795  | 0.01026  |
| C | 3.38045 | 1.94047  | -1.50147 |
| H | 3.65385 | 1.74571  | -2.54373 |
| C | 4.42545 | 2.52544  | -0.59791 |
| H | 4.79195 | 3.4973   | -0.97082 |
| H | 3.96606 | 2.72749  | 0.38494  |
| H | 8.92116 | 1.32596  | -1.18584 |
| H | 8.63033 | -0.82074 | 0.03636  |
| H | 6.40068 | -1.40573 | 0.97942  |

0.490546 (Hartree/Particle)

Thermal correction to Energy= 0.531775

Thermal correction to Enthalpy= 0.532862

Thermal correction to Gibbs Free Energy= 0.406524

SCF Done: E(RwB97XD) = -2910.02999748

C3

|   |          |          |          |
|---|----------|----------|----------|
| C | -2.58843 | -0.5182  | 0.10823  |
| C | -2.36812 | -1.90804 | 0.50875  |
| C | -2.04912 | -2.2252  | 1.86886  |
| C | -1.82085 | -1.2452  | 2.79999  |
| C | -2.34072 | 0.46127  | 1.14266  |
| C | -1.95624 | 0.12102  | 2.41562  |
| H | -2.82649 | -2.70316 | -0.0938  |
| H | -1.99864 | -3.27657 | 2.16205  |
| H | -2.5115  | 1.51724  | 0.91316  |
| H | -1.79541 | 0.90629  | 3.15797  |
| C | 2.35794  | 0.96846  | -1.92978 |
| C | 1.40934  | 0.03082  | -1.52505 |
| C | 1.88124  | -1.11926 | -0.80633 |
| C | 3.2622   | -1.30406 | -0.54002 |
| C | 4.18664  | -0.32372 | -0.973   |
| C | 3.72491  | 0.7839   | -1.65118 |

|    |          |          |          |
|----|----------|----------|----------|
| H  | 2.03183  | 1.85431  | -2.47176 |
| C  | 3.63358  | -2.46805 | 0.1752   |
| H  | 5.24678  | -0.4594  | -0.76012 |
| H  | 4.43278  | 1.54167  | -1.98802 |
| C  | 2.66642  | -3.34974 | 0.58995  |
| C  | 1.31672  | -3.0716  | 0.30346  |
| H  | 4.68773  | -2.64658 | 0.3891   |
| H  | 2.92171  | -4.2542  | 1.13796  |
| H  | 0.52896  | -3.74924 | 0.63441  |
| N  | 0.9264   | -1.99736 | -0.36546 |
| N  | 0.06468  | 0.03924  | -1.80808 |
| C  | -0.66898 | 1.17861  | -1.87587 |
| O  | -0.3569  | 2.28619  | -1.39448 |
| C  | -3.58695 | -0.16694 | -0.98514 |
| C  | -1.98462 | 1.03638  | -2.62085 |
| H  | -2.01104 | 1.86837  | -3.34213 |
| H  | -1.98569 | 0.09995  | -3.19697 |
| C  | -3.2483  | 1.1076   | -1.76298 |
| H  | -3.17783 | 1.96955  | -1.07802 |
| H  | -4.09888 | 1.32963  | -2.42666 |
| H  | -3.5867  | -1.00141 | -1.71054 |
| C  | -4.99604 | -0.05861 | -0.40199 |
| H  | -5.06367 | 0.78551  | 0.30192  |
| H  | -5.75112 | 0.09923  | -1.18625 |
| H  | -5.26663 | -0.97063 | 0.14948  |
| Ni | -0.87498 | -1.16745 | -0.51253 |
| Cs | 1.1131   | 1.98398  | 1.4047   |
| H  | -1.56344 | -1.50014 | 3.82811  |

Zero-point correction= 0.344288 (Hartree/Particle)

Thermal correction to Energy= 0.373465

Thermal correction to Enthalpy= 0.374552

Thermal correction to Gibbs Free Energy= 0.280055

SCF Done: E(RwB97XD) = -2487.01246340

C'3

|   |   |          |          |          |
|---|---|----------|----------|----------|
| C | 0 | -1.61016 | -2.81304 | -2.70324 |
| C | 0 | -2.47988 | -2.01593 | -1.73685 |
| O | 0 | -3.4676  | -1.43063 | -2.23321 |
| N | 0 | -2.08512 | -1.98124 | -0.45482 |
| C | 0 | -2.82706 | -1.40118 | 0.54817  |
| C | 0 | -2.10576 | -1.0557  | 1.74852  |
| C | 0 | -4.20239 | -1.16165 | 0.55086  |
| C | 0 | -2.7762  | -0.49294 | 2.86929  |
| C | 0 | -4.85461 | -0.60582 | 1.66663  |

|    |   |          |          |          |
|----|---|----------|----------|----------|
| H  | 0 | -4.77422 | -1.41072 | -0.33767 |
| C  | 0 | -0.06719 | -0.996   | 2.87438  |
| C  | 0 | -2.00295 | -0.1816  | 4.01218  |
| C  | 0 | -4.16955 | -0.26533 | 2.80949  |
| H  | 0 | -5.93113 | -0.44347 | 1.61307  |
| C  | 0 | -0.65484 | -0.43092 | 4.02044  |
| H  | 0 | -2.49949 | 0.25115  | 4.88093  |
| H  | 0 | -4.67417 | 0.17074  | 3.67105  |
| H  | 0 | -0.03733 | -0.20889 | 4.88727  |
| N  | 0 | -0.75981 | -1.28501 | 1.7875   |
| C  | 0 | -0.38826 | -3.56727 | -2.18994 |
| H  | 0 | 0.99928  | -1.22222 | 2.84827  |
| H  | 0 | -0.67056 | -4.31724 | -1.43652 |
| H  | 0 | -1.29152 | -2.10221 | -3.48485 |
| H  | 0 | -2.28947 | -3.51038 | -3.21644 |
| H  | 0 | 0.0347   | -4.12783 | -3.04229 |
| Ni | 0 | 0.00556  | -1.93354 | 0.09623  |
| Cs | 0 | -2.33721 | 1.52065  | -1.31817 |
| C  | 0 | 0.66427  | -2.64685 | -1.64579 |
| H  | 0 | 0.8226   | -1.73673 | -2.232   |
| C  | 0 | 1.61832  | -2.98296 | -0.68859 |
| H  | 0 | 1.59712  | -3.99255 | -0.27098 |
| H  | 0 | -0.15741 | -3.26052 | 0.69808  |
| C  | 0 | 3.26697  | 4.88224  | -0.32565 |
| C  | 0 | 3.08786  | 3.59456  | 0.18052  |
| C  | 0 | 4.18515  | 2.72846  | 0.19969  |
| C  | 0 | 5.42836  | 3.13839  | -0.26766 |
| C  | 0 | 5.59469  | 4.42733  | -0.77522 |
| C  | 0 | 4.50947  | 5.29726  | -0.80406 |
| H  | 0 | 2.41976  | 5.5707   | -0.34325 |
| H  | 0 | 4.04897  | 1.71617  | 0.58796  |
| C  | 0 | 0.86867  | 0.82265  | 0.10909  |
| O  | 0 | 0.28859  | -0.09203 | -0.61353 |
| H  | 0 | 1.2083   | 0.52883  | 1.12652  |
| C  | 0 | 1.09458  | 2.11611  | -0.2435  |
| H  | 0 | 0.83978  | 2.44856  | -1.25667 |
| C  | 0 | 1.74328  | 3.11435  | 0.67201  |
| H  | 0 | 1.09797  | 3.9963   | 0.82968  |
| H  | 0 | 1.86932  | 2.64755  | 1.66384  |
| H  | 0 | 4.6289   | 6.30655  | -1.19759 |
| H  | 0 | 6.56738  | 4.75016  | -1.14457 |
| H  | 0 | 6.27583  | 2.4529   | -0.23578 |
| C  | 0 | 2.84699  | -2.22833 | -0.38857 |
| C  | 0 | 3.52407  | -2.49958 | 0.80982  |

|                                          |                |         |          |                             |
|------------------------------------------|----------------|---------|----------|-----------------------------|
| C                                        | 0              | 3.38404 | -1.26258 | -1.25004                    |
| C                                        | 0              | 4.68916 | -1.82153 | 1.1451                      |
| H                                        | 0              | 3.11401 | -3.25233 | 1.48647                     |
| C                                        | 0              | 4.55383 | -0.58859 | -0.9179                     |
| H                                        | 0              | 2.88966 | -1.04625 | -2.19655                    |
| C                                        | 0              | 5.21153 | -0.86143 | 0.28008                     |
| H                                        | 0              | 5.1965  | -2.0475  | 2.08238                     |
| H                                        | 0              | 4.95666 | 0.15656  | -1.60385                    |
| H                                        | 0              | 6.12997 | -0.33398 | 0.53595                     |
| Zero-point correction=                   |                |         |          | 0.486441 (Hartree/Particle) |
| Thermal correction to Energy=            |                |         |          | 0.528246                    |
| Thermal correction to Enthalpy=          |                |         |          | 0.529332                    |
| Thermal correction to Gibbs Free Energy= |                |         |          | 0.403216                    |
| SCF Done: E(RwB97XD) =                   | -2909.99301338 |         |          |                             |

C4

|    |          |          |          |
|----|----------|----------|----------|
| C  | 0.55952  | 2.58323  | -1.25389 |
| C  | 0.46325  | 1.10901  | -1.65558 |
| O  | 1.47165  | 0.60811  | -2.21598 |
| N  | -0.6238  | 0.38559  | -1.40458 |
| C  | -1.81623 | 0.85637  | -0.94087 |
| C  | -2.49548 | 0.10356  | 0.09459  |
| C  | -2.49962 | 1.95794  | -1.46433 |
| C  | -3.78322 | 0.51703  | 0.55129  |
| C  | -3.76883 | 2.34851  | -1.00495 |
| H  | -2.03368 | 2.51725  | -2.2756  |
| C  | -2.48103 | -1.67373 | 1.56158  |
| C  | -4.39176 | -0.24751 | 1.57437  |
| C  | -4.41322 | 1.65243  | -0.00933 |
| H  | -4.24579 | 3.21958  | -1.45547 |
| C  | -3.74699 | -1.34295 | 2.087    |
| H  | -5.37515 | 0.05115  | 1.94035  |
| H  | -5.39726 | 1.95042  | 0.35288  |
| H  | -4.18992 | -1.95034 | 2.87391  |
| N  | -1.87383 | -0.99144 | 0.61259  |
| C  | 1.91536  | 3.00891  | -0.70381 |
| H  | -1.95139 | -2.54857 | 1.95101  |
| H  | 2.71433  | 2.50734  | -1.27095 |
| H  | -0.23523 | 2.85708  | -0.54411 |
| H  | 0.35641  | 3.16131  | -2.16992 |
| H  | 2.04598  | 4.09004  | -0.86939 |
| Cs | 0.83783  | -2.34817 | -0.97443 |
| C  | 2.0972   | 2.75674  | 0.79638  |
| H  | 1.2183   | 3.18993  | 1.30512  |

|                                          |                |          |                             |
|------------------------------------------|----------------|----------|-----------------------------|
| C                                        | 3.3359         | 3.49013  | 1.30668                     |
| H                                        | 3.23375        | 4.57375  | 1.15632                     |
| H                                        | 4.24114        | 3.16994  | 0.77075                     |
| H                                        | 3.50176        | 3.31106  | 2.37779                     |
| C                                        | 2.14726        | 1.29221  | 1.17512                     |
| C                                        | 3.25611        | 0.49943  | 0.8517                      |
| C                                        | 1.11915        | 0.71153  | 1.9213                      |
| C                                        | 3.35459        | -0.81335 | 1.30139                     |
| H                                        | 4.06594        | 0.92238  | 0.25539                     |
| C                                        | 1.2094         | -0.60521 | 2.37176                     |
| H                                        | 0.24055        | 1.30953  | 2.17206                     |
| C                                        | 2.33551        | -1.36826 | 2.07704                     |
| H                                        | 4.23708        | -1.40435 | 1.05588                     |
| H                                        | 0.40096        | -1.02806 | 2.96806                     |
| H                                        | 2.42062        | -2.39016 | 2.44699                     |
| Zero-point correction=                   |                |          | 0.343943 (Hartree/Particle) |
| Thermal correction to Energy=            |                |          | 0.371635                    |
| Thermal correction to Enthalpy=          |                |          | 0.372722                    |
| Thermal correction to Gibbs Free Energy= |                |          | 0.280284                    |
| SCF Done: E(RwB97XD) =                   | -978.606910722 |          |                             |

C'4

|   |          |          |          |
|---|----------|----------|----------|
| C | 1.9515   | -1.76896 | 2.18236  |
| C | 1.61394  | -2.19463 | 0.75414  |
| O | 1.05051  | -3.31551 | 0.63925  |
| N | 1.79226  | -1.38311 | -0.27909 |
| C | 2.4517   | -0.18382 | -0.23392 |
| C | 1.76295  | 1.01021  | -0.66837 |
| C | 3.79454  | -0.04623 | 0.1186   |
| C | 2.44967  | 2.26041  | -0.69293 |
| C | 4.46042  | 1.19171  | 0.08209  |
| H | 4.33896  | -0.94191 | 0.42124  |
| C | -0.18247 | 1.99058  | -1.41784 |
| C | 1.71696  | 3.39993  | -1.10367 |
| C | 3.80979  | 2.33729  | -0.31202 |
| H | 5.51071  | 1.23413  | 0.3717   |
| C | 0.40109  | 3.2746   | -1.46561 |
| H | 2.21891  | 4.36819  | -1.12701 |
| H | 4.31772  | 3.3014   | -0.34065 |
| H | -0.18944 | 4.13245  | -1.78248 |
| N | 0.45602  | 0.90547  | -1.03739 |
| C | 0.6635   | -1.49267 | 2.96574  |
| H | -1.23232 | 1.86676  | -1.70433 |
| H | 0.01867  | -2.38386 | 2.94417  |

|                                          |                |          |                             |
|------------------------------------------|----------------|----------|-----------------------------|
| H                                        | 2.59263        | -0.87824 | 2.21828                     |
| H                                        | 2.49676        | -2.59163 | 2.66585                     |
| H                                        | 0.9255         | -1.30845 | 4.02074                     |
| Cs                                       | -1.17143       | -1.98038 | -1.34185                    |
| C                                        | -0.07113       | -0.31059 | 2.42729                     |
| H                                        | 0.50641        | 0.61919  | 2.37724                     |
| C                                        | -1.34429       | -0.32821 | 2.01008                     |
| H                                        | -1.88773       | -1.27957 | 2.05996                     |
| C                                        | -2.11687       | 0.79993  | 1.48126                     |
| C                                        | -1.65252       | 2.12445  | 1.49885                     |
| C                                        | -3.37955       | 0.55408  | 0.92254                     |
| C                                        | -2.42112       | 3.15593  | 0.9755                      |
| H                                        | -0.674         | 2.35236  | 1.92342                     |
| C                                        | -4.14695       | 1.58539  | 0.38958                     |
| H                                        | -3.76526       | -0.46737 | 0.91837                     |
| C                                        | -3.67062       | 2.8935   | 0.41447                     |
| H                                        | -2.03909       | 4.17619  | 1.00173                     |
| H                                        | -5.12448       | 1.3665   | -0.03893                    |
| H                                        | -4.27035       | 3.70516  | 0.00511                     |
| Zero-point correction=                   |                |          | 0.320994 (Hartree/Particle) |
| Thermal correction to Energy=            |                |          | 0.348022                    |
| Thermal correction to Enthalpy=          |                |          | 0.349108                    |
| Thermal correction to Gibbs Free Energy= |                |          | 0.257229                    |
| SCF Done: E(RwB97XD) =                   | -977.378286138 |          |                             |

cod

|   |          |          |          |
|---|----------|----------|----------|
| C | 1.91303  | 0.03784  | -0.02455 |
| C | 1.1089   | -1.06424 | 0.6696   |
| H | 2.4225   | -0.4016  | -0.89878 |
| H | 1.81726  | -1.84958 | 0.96937  |
| H | 0.67929  | -0.68819 | 1.60494  |
| C | -1.10888 | 1.06422  | 0.66963  |
| H | -1.81721 | 1.84955  | 0.96948  |
| H | -0.67923 | 0.68811  | 1.60493  |
| C | -1.91303 | -0.03782 | -0.02456 |
| H | -2.73228 | -0.35894 | 0.64164  |
| H | -2.42245 | 0.40166  | -0.8988  |
| C | -0.06273 | 1.68319  | -0.21687 |
| H | -0.37722 | 2.60252  | -0.7191  |
| C | 1.17118  | 1.25154  | -0.49739 |
| H | 1.75501  | 1.87319  | -1.183   |
| C | -1.1712  | -1.25153 | -0.49738 |
| H | -1.75505 | -1.8732  | -1.18295 |
| C | 0.06271  | -1.68319 | -0.21688 |



|                                          |                |          |                             |
|------------------------------------------|----------------|----------|-----------------------------|
| H                                        | 0.37716        | -2.60255 | -0.71908                    |
| H                                        | 2.73224        | 0.35898  | 0.64169                     |
| Zero-point correction=                   |                |          | 0.179471 (Hartree/Particle) |
| Thermal correction to Energy=            |                |          | 0.189312                    |
| Thermal correction to Enthalpy=          |                |          | 0.190399                    |
| Thermal correction to Gibbs Free Energy= |                |          | 0.141662                    |
| SCF Done: E(RwB97XD) =                   | -312.038921455 |          |                             |

Ni(COD)<sub>2</sub>

|   |          |          |          |
|---|----------|----------|----------|
| C | 2.20253  | -1.8142  | 0.63017  |
| C | 2.59921  | -0.55946 | 1.41721  |
| H | 1.62254  | -2.47578 | 1.29326  |
| H | 2.8596   | -0.85455 | 2.44378  |
| H | 3.51469  | -0.11737 | 1.00055  |
| C | 2.59673  | 0.56049  | -1.41921 |
| H | 2.85412  | 0.85657  | -2.44624 |
| H | 3.51375  | 0.11877  | -1.00547 |
| C | 2.20159  | 1.81466  | -0.6303  |
| H | 3.10583  | 2.38852  | -0.35661 |
| H | 1.62137  | 2.47736  | -1.29203 |
| C | 1.50045  | -0.48091 | -1.46559 |
| H | 0.9605   | -0.55956 | -2.41185 |
| C | 1.35591  | -1.53431 | -0.58417 |
| H | 0.73892  | -2.37399 | -0.91597 |
| C | 1.35611  | 1.53432  | 0.58473  |
| H | 0.73793  | 2.37305  | 0.91659  |
| C | 1.50221  | 0.48094  | 1.46551  |
| H | 0.96196  | 0.55763  | 2.41173  |
| H | 3.10608  | -2.38898 | 0.35608  |
| C | -2.20264 | -1.81409 | -0.63007 |
| C | -2.59887 | -0.55941 | -1.41748 |
| H | -1.62278 | -2.47601 | -1.29293 |
| H | -2.85878 | -0.85468 | -2.44411 |
| H | -3.51455 | -0.11726 | -1.00134 |
| C | -2.59707 | 0.56043  | 1.41909  |
| H | -2.85484 | 0.85642  | 2.44605  |
| H | -3.5139  | 0.11872  | 1.00496  |
| C | -2.20161 | 1.81464  | 0.63039  |
| H | -3.10572 | 2.38864  | 0.35655  |
| H | -1.62147 | 2.47719  | 1.29234  |
| C | -1.50075 | -0.48088 | 1.46572  |
| H | -0.96061 | -0.5592  | 2.41189  |
| C | -1.35604 | -1.53422 | 0.58431  |
| H | -0.73878 | -2.37372 | 0.91599  |

|                                          |                |          |                             |
|------------------------------------------|----------------|----------|-----------------------------|
| C                                        | -1.35588       | 1.53429  | -0.58447                    |
| H                                        | -0.73772       | 2.37309  | -0.91622                    |
| C                                        | -1.50186       | 0.48103  | -1.46549                    |
| H                                        | -0.96175       | 0.55804  | -2.41175                    |
| H                                        | -3.10641       | -2.3885  | -0.35595                    |
| Ni                                       | 0.             | -0.00087 | -0.00006                    |
| Zero-point correction=                   |                |          | 0.362137 (Hartree/Particle) |
| Thermal correction to Energy=            |                |          | 0.383997                    |
| Thermal correction to Enthalpy=          |                |          | 0.385084                    |
| Thermal correction to Gibbs Free Energy= |                |          | 0.311190                    |
| SCF Done: E(RwB97XD) =                   | -2132.51401948 |          |                             |

### PhB(OH)<sub>2</sub>

|                                          |                |          |                             |
|------------------------------------------|----------------|----------|-----------------------------|
| B                                        | 1.73748        | 0.       | -0.00001                    |
| O                                        | 2.37871        | 1.20412  | 0.08691                     |
| H                                        | 3.34416        | 1.13081  | 0.08486                     |
| O                                        | 2.3787         | -1.20412 | -0.08689                    |
| H                                        | 3.34415        | -1.1308  | -0.08482                    |
| C                                        | 0.17261        | 0.00001  | -0.00001                    |
| C                                        | -0.55083       | -1.19918 | 0.04041                     |
| C                                        | -0.55084       | 1.19918  | -0.04043                    |
| C                                        | -1.94169       | -1.20442 | 0.04361                     |
| H                                        | -0.01199       | -2.14656 | 0.07269                     |
| C                                        | -1.94171       | 1.20441  | -0.04361                    |
| H                                        | -0.01202       | 2.14658  | -0.07273                    |
| C                                        | -2.63969       | 0.       | 0.00001                     |
| H                                        | -2.48444       | -2.14836 | 0.07959                     |
| H                                        | -2.48446       | 2.14836  | -0.07958                    |
| H                                        | -3.72924       | -0.00002 | 0.00002                     |
| Zero-point correction=                   |                |          | 0.124915 (Hartree/Particle) |
| Thermal correction to Energy=            |                |          | 0.135073                    |
| Thermal correction to Enthalpy=          |                |          | 0.136160                    |
| Thermal correction to Gibbs Free Energy= |                |          | 0.085834                    |
| SCF Done: E(RwB97XD) =                   | -408.288978202 |          |                             |

### PMe<sub>3</sub>

|   |   |          |          |          |
|---|---|----------|----------|----------|
| P | 0 | -1.53834 | -0.92251 | 0.00024  |
| C | 0 | -0.64817 | -0.11165 | -1.40554 |
| H | 0 | -0.93148 | -0.58765 | -2.35338 |
| H | 0 | -0.92879 | 0.948    | -1.46575 |
| H | 0 | 0.44362  | -0.18022 | -1.29007 |
| C | 0 | -0.64557 | -0.11353 | 1.40546  |
| H | 0 | -0.92577 | 0.94611  | 1.46744  |
| H | 0 | -0.92733 | -0.59065 | 2.3532   |

|                                          |                |          |          |                             |
|------------------------------------------|----------------|----------|----------|-----------------------------|
| H                                        | 0              | 0.44597  | -0.18233 | 1.28797                     |
| C                                        | 0              | -0.65091 | -2.5469  | -0.00152                    |
| H                                        | 0              | -0.93312 | -3.12937 | 0.88522                     |
| H                                        | 0              | -0.93455 | -3.12822 | -0.88855                    |
| H                                        | 0              | 0.44109  | -2.4144  | -0.00236                    |
| Zero-point correction=                   |                |          |          | 0.112331 (Hartree/Particle) |
| Thermal correction to Energy=            |                |          |          | 0.120752                    |
| Thermal correction to Enthalpy=          |                |          |          | 0.121839                    |
| Thermal correction to Gibbs Free Energy= |                |          |          | 0.077411                    |
| SCF Done: E(RwB97XD) =                   | -461.117889858 |          |          |                             |

S

|                        |          |          |                             |
|------------------------|----------|----------|-----------------------------|
| C                      | 0.0263   | 2.90329  | 0.51637                     |
| C                      | 0.64135  | 2.00188  | -0.55382                    |
| N                      | -0.05227 | 0.99163  | -1.06031                    |
| C                      | -1.38981 | 0.77907  | -0.84904                    |
| C                      | -1.82298 | -0.43196 | -0.18918                    |
| C                      | -3.21651 | -0.71377 | -0.06138                    |
| C                      | -4.17925 | 0.18501  | -0.57711                    |
| C                      | -3.75538 | 1.3346   | -1.20095                    |
| C                      | -2.38618 | 1.62491  | -1.3355                     |
| N                      | -0.87458 | -1.27377 | 0.30997                     |
| C                      | -1.2662  | -2.37052 | 0.9245                      |
| C                      | -2.61587 | -2.74041 | 1.10024                     |
| C                      | -3.58423 | -1.90775 | 0.60293                     |
| C                      | -0.03837 | 2.18363  | 1.86862                     |
| C                      | 1.29639  | 1.70096  | 2.33623                     |
| C                      | 1.57388  | 0.44185  | 2.67591                     |
| O                      | 1.85376  | 2.19517  | -0.83187                    |
| Cs                     | 2.39653  | -0.99507 | -0.59419                    |
| H                      | 0.65738  | 3.79848  | 0.60391                     |
| H                      | -0.98524 | 3.23287  | 0.24426                     |
| H                      | -5.23836 | -0.05    | -0.47053                    |
| H                      | -4.48595 | 2.0358   | -1.60503                    |
| H                      | -2.07668 | 2.53128  | -1.85785                    |
| H                      | -0.47767 | -3.02035 | 1.31587                     |
| H                      | -2.86709 | -3.66371 | 1.61856                     |
| H                      | -4.64323 | -2.14639 | 0.71104                     |
| H                      | -0.45247 | 2.88283  | 2.61356                     |
| H                      | -0.73698 | 1.33403  | 1.81179                     |
| H                      | 2.0862   | 2.45775  | 2.39315                     |
| H                      | 2.56034  | 0.14377  | 3.03295                     |
| H                      | 0.80962  | -0.33847 | 2.62916                     |
| Zero-point correction= |          |          | 0.239017 (Hartree/Particle) |

|                                          |                |
|------------------------------------------|----------------|
| Thermal correction to Energy=            | 0.260563       |
| Thermal correction to Enthalpy=          | 0.261649       |
| Thermal correction to Gibbs Free Energy= | 0.180534       |
| SCF Done: E(RwB97XD) =                   | -746.317208317 |

*t*-AmylO-

|                                          |          |          |                             |
|------------------------------------------|----------|----------|-----------------------------|
| O                                        | 0.4091   | 0.00062  | 1.48519                     |
| C                                        | 0.43543  | -0.00129 | 0.13963                     |
| C                                        | 1.65464  | -0.78712 | -0.40281                    |
| H                                        | 1.72684  | -0.81954 | -1.50436                    |
| H                                        | 2.58339  | -0.33831 | -0.01532                    |
| H                                        | 1.61678  | -1.82477 | -0.03337                    |
| C                                        | 0.54191  | 1.43469  | -0.43669                    |
| H                                        | 0.53488  | 1.48874  | -1.53987                    |
| H                                        | -0.28384 | 2.05889  | -0.06163                    |
| H                                        | 1.47618  | 1.89836  | -0.08133                    |
| C                                        | -0.82917 | -0.6821  | -0.47511                    |
| H                                        | -0.77607 | -0.71819 | -1.57948                    |
| H                                        | -0.81608 | -1.7309  | -0.12726                    |
| C                                        | -2.1281  | -0.03613 | -0.03074                    |
| H                                        | -2.29877 | 0.93506  | -0.51838                    |
| H                                        | -3.00815 | -0.66096 | -0.23961                    |
| H                                        | -2.07625 | 0.13843  | 1.05344                     |
| Zero-point correction=                   |          |          | 0.149356 (Hartree/Particle) |
| Thermal correction to Energy=            |          |          | 0.159172                    |
| Thermal correction to Enthalpy=          |          |          | 0.160258                    |
| Thermal correction to Gibbs Free Energy= |          |          | 0.112164                    |
| SCF Done: E(RwB97XD) =                   |          |          | -272.488904326              |

*t*-AmylOB(OH)<sub>2</sub>

|   |          |          |          |
|---|----------|----------|----------|
| O | 0.32623  | -0.51594 | -0.2771  |
| C | -0.71339 | 0.462    | -0.10933 |
| C | -0.4644  | 1.63706  | -1.04202 |
| H | -1.2862  | 2.36274  | -0.97122 |
| H | 0.46875  | 2.15622  | -0.79379 |
| H | -0.40475 | 1.29288  | -2.08392 |
| C | -0.78616 | 0.91844  | 1.34042  |
| H | -1.70381 | 1.49961  | 1.50729  |
| H | -0.79851 | 0.05945  | 2.02412  |
| H | 0.06962  | 1.55047  | 1.60366  |
| C | -2.00305 | -0.24543 | -0.53276 |
| H | -2.81423 | 0.49918  | -0.5241  |
| H | -1.8766  | -0.55811 | -1.58147 |
| C | -2.39217 | -1.44564 | 0.31165  |

|                                          |                |          |                             |
|------------------------------------------|----------------|----------|-----------------------------|
| H                                        | -2.65912       | -1.16121 | 1.33831                     |
| H                                        | -3.26223       | -1.95789 | -0.11888                    |
| H                                        | -1.57303       | -2.17449 | 0.3661                      |
| B                                        | 1.65383        | -0.35489 | -0.02567                    |
| O                                        | 2.15873        | 0.82258  | 0.46432                     |
| H                                        | 3.11714        | 0.80103  | 0.59022                     |
| O                                        | 2.42107        | -1.45961 | -0.30187                    |
| H                                        | 3.36065        | -1.33028 | -0.11852                    |
| Zero-point correction=                   |                |          | 0.189114 (Hartree/Particle) |
| Thermal correction to Energy=            |                |          | 0.203289                    |
| Thermal correction to Enthalpy=          |                |          | 0.204376                    |
| Thermal correction to Gibbs Free Energy= |                |          | 0.145988                    |
| SCF Done: E(RwB97XD) =                   | -449.092709338 |          |                             |

*t*-AmylOH

|                                          |                |          |                             |
|------------------------------------------|----------------|----------|-----------------------------|
| O                                        | 0.41361        | 0.06081  | 1.44315                     |
| C                                        | 0.42503        | -0.00776 | 0.01273                     |
| C                                        | 1.63441        | -0.812   | -0.44146                    |
| H                                        | 1.68115        | -0.88061 | -1.53728                    |
| H                                        | 2.56552        | -0.33922 | -0.09568                    |
| H                                        | 1.59689        | -1.83134 | -0.03306                    |
| C                                        | 0.48456        | 1.39874  | -0.56467                    |
| H                                        | 0.39215        | 1.38611  | -1.65986                    |
| H                                        | -0.31542       | 2.03021  | -0.1576                     |
| H                                        | 1.44526        | 1.87382  | -0.31607                    |
| C                                        | -0.85693       | -0.73967 | -0.37828                    |
| H                                        | -0.82304       | -0.93274 | -1.46195                    |
| H                                        | -0.83097       | -1.72497 | 0.1141                      |
| C                                        | -2.14693       | -0.02292 | -0.01795                    |
| H                                        | -2.28337       | 0.89734  | -0.60158                    |
| H                                        | -3.01709       | -0.66223 | -0.21492                    |
| H                                        | -2.16702       | 0.24712  | 1.04578                     |
| H                                        | 1.20622        | 0.55178  | 1.71062                     |
| Zero-point correction=                   |                |          | 0.163660 (Hartree/Particle) |
| Thermal correction to Energy=            |                |          | 0.173921                    |
| Thermal correction to Enthalpy=          |                |          | 0.175008                    |
| Thermal correction to Gibbs Free Energy= |                |          | 0.126382                    |
| SCF Done: E(RwB97XD) =                   | -273.013166708 |          |                             |

TS1A

|   |   |          |          |          |
|---|---|----------|----------|----------|
| C | 0 | -0.88386 | -3.15659 | -2.33887 |
| C | 0 | 0.16563  | -2.2275  | -1.74479 |
| O | 0 | 1.24885  | -2.73286 | -1.34801 |
| N | 0 | -0.1541  | -0.93918 | -1.73421 |

|    |   |          |          |          |
|----|---|----------|----------|----------|
| C  | 0 | 0.72076  | -0.02599 | -1.17944 |
| C  | 0 | 0.90754  | 0.09395  | 0.24569  |
| C  | 0 | 1.38951  | 0.88846  | -1.98748 |
| C  | 0 | 1.72625  | 1.1428   | 0.76829  |
| C  | 0 | 2.21332  | 1.90079  | -1.46368 |
| H  | 0 | 1.2497   | 0.80701  | -3.06649 |
| C  | 0 | 0.4649   | -0.69978 | 2.3635   |
| C  | 0 | 1.87401  | 1.21913  | 2.17491  |
| C  | 0 | 2.38053  | 2.04321  | -0.10485 |
| H  | 0 | 2.71493  | 2.58425  | -2.14902 |
| C  | 0 | 1.24934  | 0.30165  | 2.97876  |
| H  | 0 | 2.48935  | 2.0145   | 2.59806  |
| H  | 0 | 3.00753  | 2.83048  | 0.31446  |
| H  | 0 | 1.34268  | 0.33454  | 4.06247  |
| N  | 0 | 0.29612  | -0.80589 | 1.06382  |
| C  | 0 | -1.58681 | -2.61786 | -3.58474 |
| H  | 0 | -0.04959 | -1.43808 | 2.98492  |
| H  | 0 | -0.82763 | -2.17086 | -4.24708 |
| H  | 0 | -1.63145 | -3.39181 | -1.56305 |
| H  | 0 | -0.37455 | -4.10042 | -2.57896 |
| H  | 0 | -2.00314 | -3.47656 | -4.13847 |
| Ni | 0 | -2.39355 | -0.15796 | -1.98498 |
| P  | 0 | -2.57388 | 1.5903   | -0.70802 |
| C  | 0 | -1.35913 | 2.96173  | -0.83848 |
| H  | 0 | -1.69729 | 3.8356   | -0.2631  |
| H  | 0 | -0.3823  | 2.64479  | -0.44955 |
| H  | 0 | -1.23321 | 3.24867  | -1.89053 |
| C  | 0 | -2.68741 | 1.41906  | 1.11595  |
| H  | 0 | -1.77171 | 0.95382  | 1.50745  |
| H  | 0 | -2.81393 | 2.40635  | 1.58275  |
| H  | 0 | -3.53961 | 0.78225  | 1.38549  |
| C  | 0 | -4.14099 | 2.46166  | -1.093   |
| H  | 0 | -4.99077 | 1.78986  | -0.91462 |
| H  | 0 | -4.26202 | 3.36163  | -0.47301 |
| H  | 0 | -4.145   | 2.75046  | -2.15268 |
| Cs | 0 | 3.81016  | -1.89533 | 0.11369  |
| C  | 0 | -2.70529 | -1.62496 | -3.38153 |
| H  | 0 | -3.67531 | -2.04694 | -3.11355 |
| C  | 0 | -2.68207 | -0.38124 | -4.02372 |
| H  | 0 | -3.61049 | 0.15531  | -4.23232 |
| H  | 0 | -1.86305 | -0.14555 | -4.70637 |
| H  | 0 | -1.90874 | 0.90546  | -2.96719 |
| C  | 0 | -3.44527 | -1.19377 | -0.70809 |
| C  | 0 | -2.94132 | -1.88977 | 0.40508  |

|                                          |                |          |          |                             |
|------------------------------------------|----------------|----------|----------|-----------------------------|
| C                                        | 0              | -4.84674 | -1.17679 | -0.83552                    |
| C                                        | 0              | -3.77676 | -2.51405 | 1.3334                      |
| H                                        | 0              | -1.8606  | -1.92387 | 0.56989                     |
| C                                        | 0              | -5.6953  | -1.78545 | 0.09132                     |
| H                                        | 0              | -5.3012  | -0.66262 | -1.69085                    |
| C                                        | 0              | -5.16202 | -2.45985 | 1.18789                     |
| H                                        | 0              | -3.34196 | -3.04241 | 2.18463                     |
| H                                        | 0              | -6.77741 | -1.73519 | -0.04473                    |
| H                                        | 0              | -5.81665 | -2.93949 | 1.91595                     |
| Zero-point correction=                   |                |          |          | 0.451139 (Hartree/Particle) |
| Thermal correction to Energy=            |                |          |          | 0.491260                    |
| Thermal correction to Enthalpy=          |                |          |          | 0.492347                    |
| Thermal correction to Gibbs Free Energy= |                |          |          | 0.371428                    |
| SCF Done: E(RwB97XD) =                   | -2948.08709341 |          |          |                             |

#### TS1B

|    |          |          |          |
|----|----------|----------|----------|
| C  | -1.39923 | -1.43765 | -2.7495  |
| C  | -0.16458 | -0.70996 | -2.23465 |
| O  | 0.92253  | -1.33876 | -2.2741  |
| N  | -0.37667 | 0.50512  | -1.7228  |
| C  | 0.65921  | 1.23654  | -1.19462 |
| C  | 0.41534  | 1.92902  | 0.04387  |
| C  | 1.91303  | 1.40798  | -1.78204 |
| C  | 1.43548  | 2.72261  | 0.64221  |
| C  | 2.90739  | 2.20803  | -1.19303 |
| H  | 2.11724  | 0.90474  | -2.7246  |
| C  | -1.04626 | 2.40922  | 1.78873  |
| C  | 1.14338  | 3.36321  | 1.86939  |
| C  | 2.69156  | 2.84956  | 0.00579  |
| H  | 3.86683  | 2.31435  | -1.69991 |
| C  | -0.09015 | 3.2047   | 2.445    |
| H  | 1.91061  | 3.97951  | 2.33863  |
| H  | 3.46056  | 3.46605  | 0.47073  |
| H  | -0.34788 | 3.6842   | 3.38642  |
| N  | -0.81163 | 1.80083  | 0.63939  |
| C  | -2.7265  | -0.69101 | -2.74887 |
| H  | -2.0402  | 2.27563  | 2.21541  |
| H  | -2.60654 | 0.27029  | -3.27199 |
| H  | -1.48746 | -2.36095 | -2.15149 |
| H  | -1.1638  | -1.77995 | -3.76932 |
| H  | -3.44469 | -1.27832 | -3.34816 |
| Ni | -2.16125 | 0.72528  | -0.30043 |
| Cs | 2.83881  | -1.41392 | 0.22127  |
| C  | -3.34387 | -0.43811 | -1.39496 |

|                                          |                |          |                             |
|------------------------------------------|----------------|----------|-----------------------------|
| H                                        | -3.61687       | -1.31958 | -0.81183                    |
| C                                        | -4.0167        | 0.77352  | -1.15447                    |
| H                                        | -4.71535       | 0.8552   | -0.31782                    |
| H                                        | -4.2468        | 1.441    | -1.98575                    |
| H                                        | -2.68475       | 2.01645  | -0.94081                    |
| C                                        | -1.88485       | -0.78854 | 0.90568                     |
| C                                        | -0.89601       | -1.7811  | 0.81303                     |
| C                                        | -2.70446       | -0.84966 | 2.04733                     |
| C                                        | -0.71688       | -2.75663 | 1.79721                     |
| H                                        | -0.24791       | -1.81465 | -0.06749                    |
| C                                        | -2.53771       | -1.81512 | 3.04264                     |
| H                                        | -3.50933       | -0.11601 | 2.17321                     |
| C                                        | -1.53587       | -2.77652 | 2.92428                     |
| H                                        | 0.06018        | -3.51587 | 1.67791                     |
| H                                        | -3.19708       | -1.82082 | 3.91273                     |
| H                                        | -1.40213       | -3.53584 | 3.69499                     |
| Zero-point correction=                   |                |          | 0.337935 (Hartree/Particle) |
| Thermal correction to Energy=            |                |          | 0.367327                    |
| Thermal correction to Enthalpy=          |                |          | 0.368413                    |
| Thermal correction to Gibbs Free Energy= |                |          | 0.272147                    |
| SCF Done: E(RwB97XD) =                   | -2486.94301532 |          |                             |

#### TS1C

|   |   |          |          |          |
|---|---|----------|----------|----------|
| C | 0 | -2.8538  | -0.4801  | 0.00801  |
| C | 0 | -4.0586  | 0.28402  | 0.08817  |
| C | 0 | -4.78161 | 0.64044  | -1.03885 |
| C | 0 | -4.37124 | 0.24124  | -2.31817 |
| C | 0 | -2.49439 | -0.91201 | -1.30014 |
| C | 0 | -3.22349 | -0.54276 | -2.42842 |
| H | 0 | -4.40278 | 0.62407  | 1.06819  |
| H | 0 | -5.67757 | 1.2539   | -0.92547 |
| H | 0 | -1.60794 | -1.53714 | -1.43082 |
| H | 0 | -2.89009 | -0.88126 | -3.4122  |
| C | 0 | 2.65747  | 0.97309  | 1.48409  |
| C | 0 | 1.27855  | 0.86201  | 1.36961  |
| C | 0 | 0.57506  | 1.95672  | 0.77842  |
| C | 0 | 1.25897  | 3.12468  | 0.3479   |
| C | 0 | 2.66202  | 3.19799  | 0.50774  |
| C | 0 | 3.33661  | 2.13124  | 1.06068  |
| H | 0 | 3.21555  | 0.14251  | 1.91657  |
| C | 0 | 0.48952  | 4.1363   | -0.2768  |
| H | 0 | 3.18912  | 4.09356  | 0.1792   |
| H | 0 | 4.41935  | 2.17843  | 1.17568  |
| C | 0 | -0.85688 | 3.94504  | -0.46928 |



|                                          |                |          |          |                             |
|------------------------------------------|----------------|----------|----------|-----------------------------|
| C                                        | 0              | -1.44917 | 2.74442  | -0.0321                     |
| H                                        | 0              | 0.98221  | 5.05029  | -0.60946                    |
| H                                        | 0              | -1.47241 | 4.69935  | -0.95477                    |
| H                                        | 0              | -2.51338 | 2.5528   | -0.19302                    |
| N                                        | 0              | -0.77147 | 1.78822  | 0.58244                     |
| N                                        | 0              | 0.53295  | -0.21823 | 1.81895                     |
| C                                        | 0              | 0.65907  | -1.40189 | 1.1779                      |
| O                                        | 0              | 1.32463  | -1.61865 | 0.13772                     |
| C                                        | 0              | -2.52887 | -1.68456 | 1.31722                     |
| C                                        | 0              | -0.13947 | -2.54427 | 1.78367                     |
| H                                        | 0              | 0.46992  | -3.45609 | 1.69877                     |
| H                                        | 0              | -0.31905 | -2.35677 | 2.85223                     |
| C                                        | 0              | -1.47976 | -2.78148 | 1.08091                     |
| H                                        | 0              | -1.29991 | -2.92362 | 0.0021                      |
| H                                        | 0              | -1.88422 | -3.74731 | 1.43215                     |
| H                                        | 0              | -2.3562  | -1.2228  | 2.32395                     |
| C                                        | 0              | -3.91465 | -2.32144 | 1.39826                     |
| H                                        | 0              | -4.1892  | -2.78229 | 0.43547                     |
| H                                        | 0              | -3.92079 | -3.11432 | 2.16277                     |
| H                                        | 0              | -4.69911 | -1.60149 | 1.65805                     |
| Ni                                       | 0              | -1.42296 | 0.01259  | 1.08623                     |
| Cs                                       | 0              | 0.9899   | 0.33698  | -2.31422                    |
| H                                        | 0              | -4.94349 | 0.5237   | -3.20092                    |
| Zero-point correction=                   |                |          |          | 0.341819 (Hartree/Particle) |
| Thermal correction to Energy=            |                |          |          | 0.370854                    |
| Thermal correction to Enthalpy=          |                |          |          | 0.371941                    |
| Thermal correction to Gibbs Free Energy= |                |          |          | 0.277115                    |
| SCF Done: E(RwB97XD) =                   | -2486.95014741 |          |          |                             |

#### TS1D

|   |          |          |          |
|---|----------|----------|----------|
| C | 0.22079  | -2.52276 | -1.79716 |
| C | -0.69758 | -1.68476 | -0.91367 |
| O | -1.93333 | -1.89393 | -1.02977 |
| N | -0.10014 | -0.88338 | -0.04451 |
| C | -0.86651 | -0.04936 | 0.73817  |
| C | -1.5889  | 1.07129  | 0.18258  |
| C | -0.90308 | -0.20278 | 2.1218   |
| C | -2.3117  | 1.94862  | 1.04831  |
| C | -1.62023 | 0.66752  | 2.96287  |
| H | -0.3579  | -1.04262 | 2.55565  |
| C | -2.23776 | 2.26819  | -1.67483 |
| C | -3.02783 | 3.01456  | 0.45115  |
| C | -2.32358 | 1.73035  | 2.44569  |
| H | -1.61739 | 0.48638  | 4.03785  |

|    |          |          |          |
|----|----------|----------|----------|
| C  | -3.00255 | 3.17638  | -0.90908 |
| H  | -3.59011 | 3.69609  | 1.09126  |
| H  | -2.8856  | 2.41003  | 3.08665  |
| H  | -3.54143 | 3.98511  | -1.39867 |
| N  | -1.5593  | 1.26359  | -1.16547 |
| C  | 1.62343  | -2.03964 | -2.05719 |
| H  | -2.18636 | 2.39379  | -2.75936 |
| H  | 2.2826   | -2.49184 | -0.30449 |
| H  | -0.29871 | -2.64747 | -2.76161 |
| H  | 0.25444  | -3.53009 | -1.35091 |
| H  | 2.30257  | -2.81629 | -2.42292 |
| Ni | 2.42935  | -0.9888  | -0.47331 |
| P  | 3.15361  | -1.12926 | 1.55741  |
| C  | 2.51738  | -2.52277 | 2.56472  |
| H  | 2.85748  | -2.45795 | 3.60799  |
| H  | 1.41952  | -2.52802 | 2.54255  |
| H  | 2.867    | -3.46852 | 2.13054  |
| C  | 2.83776  | 0.29913  | 2.66272  |
| H  | 3.36796  | 1.18687  | 2.29566  |
| H  | 1.76239  | 0.52543  | 2.68062  |
| H  | 3.17385  | 0.07457  | 3.68487  |
| C  | 4.96365  | -1.34934 | 1.72487  |
| H  | 5.48628  | -0.47796 | 1.31096  |
| H  | 5.24469  | -1.46227 | 2.78161  |
| H  | 5.28325  | -2.24163 | 1.17145  |
| Cs | -4.61219 | -0.75252 | -0.09153 |
| C  | 1.93427  | -0.72544 | -2.42944 |
| H  | 1.12439  | 0.01058  | -2.41599 |
| C  | 3.08713  | -0.43786 | -3.34699 |
| H  | 3.92029  | -1.13494 | -3.1708  |
| H  | 3.47521  | 0.58112  | -3.22149 |
| H  | 2.78794  | -0.54592 | -4.40266 |
| C  | 2.9694   | 0.87114  | -0.51778 |
| C  | 2.07331  | 1.93693  | -0.33595 |
| C  | 4.32161  | 1.22209  | -0.68119 |
| C  | 2.49767  | 3.26578  | -0.29202 |
| H  | 1.0077   | 1.72591  | -0.21429 |
| C  | 4.76058  | 2.54671  | -0.63866 |
| H  | 5.06481  | 0.43518  | -0.84846 |
| C  | 3.84792  | 3.58014  | -0.43643 |
| H  | 1.76721  | 4.06376  | -0.14473 |
| H  | 5.8211   | 2.77331  | -0.76343 |
| H  | 4.18327  | 4.61676  | -0.39882 |

Zero-point correction=

0.450997 (Hartree/Particle)

|                                          |                |
|------------------------------------------|----------------|
| Thermal correction to Energy=            | 0.491304       |
| Thermal correction to Enthalpy=          | 0.492391       |
| Thermal correction to Gibbs Free Energy= | 0.369948       |
| SCF Done: E(RwB97XD) =                   | -2948.09204337 |

TS2A

|    |   |          |          |          |
|----|---|----------|----------|----------|
| C  | 0 | 0.03871  | -3.39632 | 0.18344  |
| C  | 0 | 0.88021  | -2.15942 | -0.11983 |
| O  | 0 | 2.08334  | -2.19515 | 0.25374  |
| N  | 0 | 0.28564  | -1.1975  | -0.81061 |
| C  | 0 | 0.96744  | -0.05321 | -1.15034 |
| C  | 0 | 1.41788  | 0.92957  | -0.19238 |
| C  | 0 | 1.16169  | 0.24716  | -2.4991  |
| C  | 0 | 2.0374   | 2.13464  | -0.65429 |
| C  | 0 | 1.78254  | 1.42824  | -2.93809 |
| H  | 0 | 0.81583  | -0.48522 | -3.22993 |
| C  | 0 | 1.66906  | 1.5775   | 2.00338  |
| C  | 0 | 2.47411  | 3.06485  | 0.32022  |
| C  | 0 | 2.2219   | 2.36929  | -2.03585 |
| H  | 0 | 1.91281  | 1.5935   | -4.00779 |
| C  | 0 | 2.30272  | 2.78954  | 1.65083  |
| H  | 0 | 2.94608  | 3.99132  | -0.01032 |
| H  | 0 | 2.70229  | 3.293    | -2.35933 |
| H  | 0 | 2.63234  | 3.4794   | 2.42522  |
| N  | 0 | 1.23666  | 0.68792  | 1.1362   |
| C  | 0 | -1.31392 | -3.5236  | -0.51136 |
| H  | 0 | 1.51293  | 1.34932  | 3.0613   |
| H  | 0 | -1.22875 | -3.0832  | -1.51597 |
| H  | 0 | -0.08562 | -3.45839 | 1.27693  |
| H  | 0 | 0.67592  | -4.25467 | -0.08297 |
| H  | 0 | -1.51712 | -4.59895 | -0.6649  |
| Ni | 0 | -2.49227 | -1.06704 | 0.72795  |
| P  | 0 | -2.46616 | 0.8925   | 1.74246  |
| C  | 0 | -1.82164 | 2.31833  | 0.78102  |
| H  | 0 | -1.66383 | 3.19269  | 1.42889  |
| H  | 0 | -0.87708 | 2.05721  | 0.28692  |
| H  | 0 | -2.54962 | 2.58045  | 0.00144  |
| C  | 0 | -1.5226  | 0.94993  | 3.31305  |
| H  | 0 | -0.54108 | 0.48732  | 3.16473  |
| H  | 0 | -1.40187 | 1.97671  | 3.68745  |
| H  | 0 | -2.06397 | 0.35659  | 4.06262  |
| C  | 0 | -4.08364 | 1.56296  | 2.30194  |
| H  | 0 | -4.58689 | 0.83569  | 2.95236  |
| H  | 0 | -3.93924 | 2.49919  | 2.8601   |

|                                          |                |          |          |                             |
|------------------------------------------|----------------|----------|----------|-----------------------------|
| H                                        | 0              | -4.72973 | 1.76268  | 1.43786                     |
| Cs                                       | 0              | 4.61635  | -0.5334  | -0.09936                    |
| C                                        | 0              | -2.52077 | -2.92982 | 0.18135                     |
| H                                        | 0              | -2.89649 | -3.5167  | 1.02488                     |
| C                                        | 0              | -3.52775 | -2.26197 | -0.61684                    |
| H                                        | 0              | -4.56515 | -2.38206 | -0.29252                    |
| H                                        | 0              | -3.42276 | -2.38859 | -1.69743                    |
| C                                        | 0              | -3.52384 | -0.37422 | -0.84867                    |
| C                                        | 0              | -2.66804 | 0.12922  | -1.84585                    |
| C                                        | 0              | -4.80689 | 0.18345  | -0.74512                    |
| C                                        | 0              | -3.05666 | 1.19112  | -2.65472                    |
| H                                        | 0              | -1.68134 | -0.32332 | -1.96639                    |
| C                                        | 0              | -5.20019 | 1.24114  | -1.56184                    |
| H                                        | 0              | -5.50441 | -0.21119 | -0.00196                    |
| C                                        | 0              | -4.32502 | 1.75816  | -2.51646                    |
| H                                        | 0              | -2.36429 | 1.57535  | -3.40549                    |
| H                                        | 0              | -6.19871 | 1.66567  | -1.45127                    |
| H                                        | 0              | -4.63388 | 2.58328  | -3.15727                    |
| H                                        | 0              | -1.69536 | -1.62132 | 1.8857                      |
| Zero-point correction=                   |                |          |          | 0.452405 (Hartree/Particle) |
| Thermal correction to Energy=            |                |          |          | 0.491863                    |
| Thermal correction to Enthalpy=          |                |          |          | 0.492950                    |
| Thermal correction to Gibbs Free Energy= |                |          |          | 0.373517                    |
| SCF Done: E(RwB97XD) =                   | -2948.06384571 |          |          |                             |

#### TS2B

|   |          |          |          |
|---|----------|----------|----------|
| C | 1.46558  | -3.60166 | 0.01881  |
| C | 0.62679  | -2.55795 | 0.73894  |
| O | -0.51416 | -2.90068 | 1.12798  |
| N | 1.1809   | -1.34327 | 0.83002  |
| C | 0.51814  | -0.3146  | 1.46011  |
| C | 0.55495  | 0.97029  | 0.81923  |
| C | -0.13924 | -0.39341 | 2.68592  |
| C | -0.13784 | 2.08158  | 1.37359  |
| C | -0.78623 | 0.7216   | 3.25104  |
| H | -0.16273 | -1.34837 | 3.20726  |
| C | 1.23925  | 2.22801  | -1.00741 |
| C | -0.11998 | 3.29495  | 0.64542  |
| C | -0.81652 | 1.93764  | 2.60595  |
| H | -1.28557 | 0.60663  | 4.21355  |
| C | 0.5427   | 3.36462  | -0.55319 |
| H | -0.63971 | 4.16309  | 1.0526   |
| H | -1.33817 | 2.7964   | 3.0285   |
| H | 0.56245  | 4.27813  | -1.14258 |

|    |          |          |          |
|----|----------|----------|----------|
| N  | 1.25988  | 1.08897  | -0.34474 |
| C  | 2.9267   | -3.26062 | -0.23553 |
| H  | 1.81561  | 2.26388  | -1.93276 |
| H  | 3.40679  | -2.93458 | 0.70039  |
| H  | 0.96085  | -3.80972 | -0.94101 |
| H  | 1.38481  | -4.53306 | 0.59857  |
| H  | 3.44778  | -4.1859  | -0.53999 |
| Ni | 2.31509  | -0.51063 | -0.89961 |
| Cs | -3.12233 | -1.18793 | 1.06388  |
| C  | 3.14675  | -2.22958 | -1.30544 |
| H  | 2.70493  | -2.44662 | -2.28064 |
| C  | 4.23178  | -1.32685 | -1.24783 |
| H  | 4.6058   | -0.89644 | -2.17844 |
| H  | 5.01684  | -1.51978 | -0.51474 |
| C  | 3.9047   | 0.3726   | -0.18856 |
| C  | 4.119    | 0.32005  | 1.19592  |
| C  | 4.42829  | 1.45739  | -0.90341 |
| C  | 4.78454  | 1.3526   | 1.85015  |
| H  | 3.7428   | -0.52865 | 1.76986  |
| C  | 5.09549  | 2.49008  | -0.24684 |
| H  | 4.30232  | 1.50093  | -1.98754 |
| C  | 5.27357  | 2.44558  | 1.13372  |
| H  | 4.92382  | 1.30386  | 2.93069  |
| H  | 5.48254  | 3.33258  | -0.82098 |
| H  | 5.79841  | 3.25003  | 1.64762  |
| C  | -4.82268 | 0.59739  | -1.93818 |
| C  | -3.42352 | 0.65157  | -1.96698 |
| C  | -2.7864  | 1.62666  | -1.1981  |
| C  | -3.52147 | 2.51191  | -0.40946 |
| C  | -4.91096 | 2.43805  | -0.37849 |
| C  | -5.56133 | 1.47598  | -1.15254 |
| H  | -5.33604 | -0.1558  | -2.54027 |
| H  | -1.69608 | 1.68365  | -1.21479 |
| C  | -0.24585 | -0.86704 | -2.26166 |
| O  | 1.04251  | -0.81534 | -2.42609 |
| H  | -0.62717 | -1.5897  | -1.49978 |
| C  | -1.18637 | -0.16504 | -2.94376 |
| H  | -0.85886 | 0.58161  | -3.67491 |
| C  | -2.65323 | -0.38899 | -2.75942 |
| H  | -3.16424 | -0.51135 | -3.73064 |
| H  | -2.7972  | -1.36322 | -2.25491 |
| H  | -6.6494  | 1.41389  | -1.14466 |
| H  | -5.48628 | 3.12913  | 0.23646  |
| H  | -3.00027 | 3.26467  | 0.18422  |

|                                          |                             |
|------------------------------------------|-----------------------------|
| Zero-point correction=                   | 0.486956 (Hartree/Particle) |
| Thermal correction to Energy=            | 0.528368                    |
| Thermal correction to Enthalpy=          | 0.529455                    |
| Thermal correction to Gibbs Free Energy= | 0.406827                    |
| SCF Done: E(RwB97XD) =                   | -2909.96845162              |

TS2C

|    |   |          |          |          |
|----|---|----------|----------|----------|
| C  | 0 | -2.16754 | -2.03147 | -2.83101 |
| C  | 0 | -2.91341 | -1.15465 | -1.83368 |
| O  | 0 | -3.69719 | -0.30418 | -2.30999 |
| N  | 0 | -2.61659 | -1.34286 | -0.53787 |
| C  | 0 | -3.24841 | -0.64504 | 0.46873  |
| C  | 0 | -2.50562 | -0.48862 | 1.69215  |
| C  | 0 | -4.53951 | -0.11711 | 0.44374  |
| C  | 0 | -3.07119 | 0.17821  | 2.81332  |
| C  | 0 | -5.09046 | 0.54079  | 1.55875  |
| H  | 0 | -5.12586 | -0.21898 | -0.4642  |
| C  | 0 | -0.52698 | -0.88021 | 2.85691  |
| C  | 0 | -2.28017 | 0.2916   | 3.98076  |
| C  | 0 | -4.38161 | 0.70009  | 2.72691  |
| H  | 0 | -6.10552 | 0.93104  | 1.48494  |
| C  | 0 | -1.01479 | -0.23574 | 4.00794  |
| H  | 0 | -2.69698 | 0.7981   | 4.85152  |
| H  | 0 | -4.80701 | 1.21363  | 3.58855  |
| H  | 0 | -0.38709 | -0.1699  | 4.89321  |
| N  | 0 | -1.23534 | -0.99284 | 1.74679  |
| C  | 0 | -1.26751 | -3.14139 | -2.30419 |
| H  | 0 | 0.47058  | -1.32118 | 2.84387  |
| H  | 0 | -1.8309  | -3.81297 | -1.63759 |
| H  | 0 | -1.57056 | -1.34597 | -3.45775 |
| H  | 0 | -2.92836 | -2.4481  | -3.50794 |
| H  | 0 | -0.94657 | -3.75598 | -3.16386 |
| Ni | 0 | -0.5772  | -1.73551 | 0.06665  |
| Cs | 0 | -2.03957 | 2.24776  | -1.11904 |
| C  | 0 | -0.0562  | -2.61566 | -1.59209 |
| H  | 0 | 0.50518  | -1.8402  | -2.11873 |
| C  | 0 | 0.57484  | -3.32581 | -0.54571 |
| H  | 0 | 0.26063  | -4.36051 | -0.36734 |
| H  | 0 | -0.59432 | -3.09479 | 0.66512  |
| C  | 0 | 4.5191   | 3.7818   | -0.10075 |
| C  | 0 | 3.88445  | 2.64217  | 0.39427  |
| C  | 0 | 4.62922  | 1.46407  | 0.50919  |
| C  | 0 | 5.97135  | 1.42756  | 0.14955  |
| C  | 0 | 6.59411  | 2.57292  | -0.3473  |

|                                          |                |         |          |                             |
|------------------------------------------|----------------|---------|----------|-----------------------------|
| C                                        | 0              | 5.86233 | 3.74935  | -0.47395                    |
| H                                        | 0              | 3.95176 | 4.71011  | -0.19253                    |
| H                                        | 0              | 4.13812 | 0.56424  | 0.88813                     |
| C                                        | 0              | 0.92226 | 0.74144  | 0.13042                     |
| O                                        | 0              | 0.12947 | 0.04414  | -0.6284                     |
| H                                        | 0              | 1.10923 | 0.35881  | 1.15939                     |
| C                                        | 0              | 1.5399  | 1.91244  | -0.18403                    |
| H                                        | 0              | 1.44471 | 2.31261  | -1.20027                    |
| C                                        | 0              | 2.42382 | 2.65185  | 0.77979                     |
| H                                        | 0              | 2.10449 | 3.70222  | 0.89597                     |
| H                                        | 0              | 2.31668 | 2.18877  | 1.77566                     |
| H                                        | 0              | 6.33911 | 4.65002  | -0.86034                    |
| H                                        | 0              | 7.64527 | 2.5462   | -0.63206                    |
| H                                        | 0              | 6.53932 | 0.50295  | 0.25955                     |
| C                                        | 0              | 1.93672 | -3.01141 | -0.04657                    |
| C                                        | 0              | 2.34291 | -3.52022 | 1.19502                     |
| C                                        | 0              | 2.84483 | -2.2344  | -0.77519                    |
| C                                        | 0              | 3.60875 | -3.25045 | 1.70028                     |
| H                                        | 0              | 1.64229 | -4.12857 | 1.77087                     |
| C                                        | 0              | 4.11543 | -1.97163 | -0.273                      |
| H                                        | 0              | 2.56471 | -1.83967 | -1.75097                    |
| C                                        | 0              | 4.50331 | -2.47134 | 0.9677                      |
| H                                        | 0              | 3.90081 | -3.65404 | 2.66924                     |
| H                                        | 0              | 4.8084  | -1.37235 | -0.86319                    |
| H                                        | 0              | 5.49835 | -2.26108 | 1.35858                     |
| Zero-point correction=                   |                |         |          | 0.485149 (Hartree/Particle) |
| Thermal correction to Energy=            |                |         |          | 0.526569                    |
| Thermal correction to Enthalpy=          |                |         |          | 0.527656                    |
| Thermal correction to Gibbs Free Energy= |                |         |          | 0.402712                    |
| SCF Done: E(RwB97XD) =                   | -2909.98543471 |         |          |                             |
